# Supplementary material for: Differentiation-state plasticity is a targetable resistance mechanism in basal-like breast cancer
Source: PubMed Central journal article supplement (PMC6145927; doi:10.1038/s41467-018-05729-w), 2018-09-19

## Supplementary Data 1

### **Measuring differentiation-state heterogeneity in primary patient samples and patient-derived xenografts.**

All patient tumors (p.2-7) and patient-derived xenograft tumors (p.8-11) analyzed in this study are presented with the following: 4-color IF images showing DAPI (yellow), K19 (blue), K14 (green) and VIM (red) with normal structures excluded, scale bars = 100 $\mu$ m (left panel). An x/y dotplot showing single cell location and cellular phenotype, with an accompanying legend showing phenotype counts (middle panel). Dot plots comparing single tumor cell intensity of K19 vs. VIM, and K14 vs. VIM, with positivity gates shown for each marker (right panel).

# Triple Negative Tumors

IF: DAPI K19 K14 VIM

Cell Phenotype (K19 / K14 / VIM):

■ +/+/+ 
 ■ -/+/- 
 ■ -/-/+ 
 ■ +/+/+ 
 ■ +/+/+ 
 ■ -/+/+ 
 ■ +/+/+ 
 ■ -/-/-

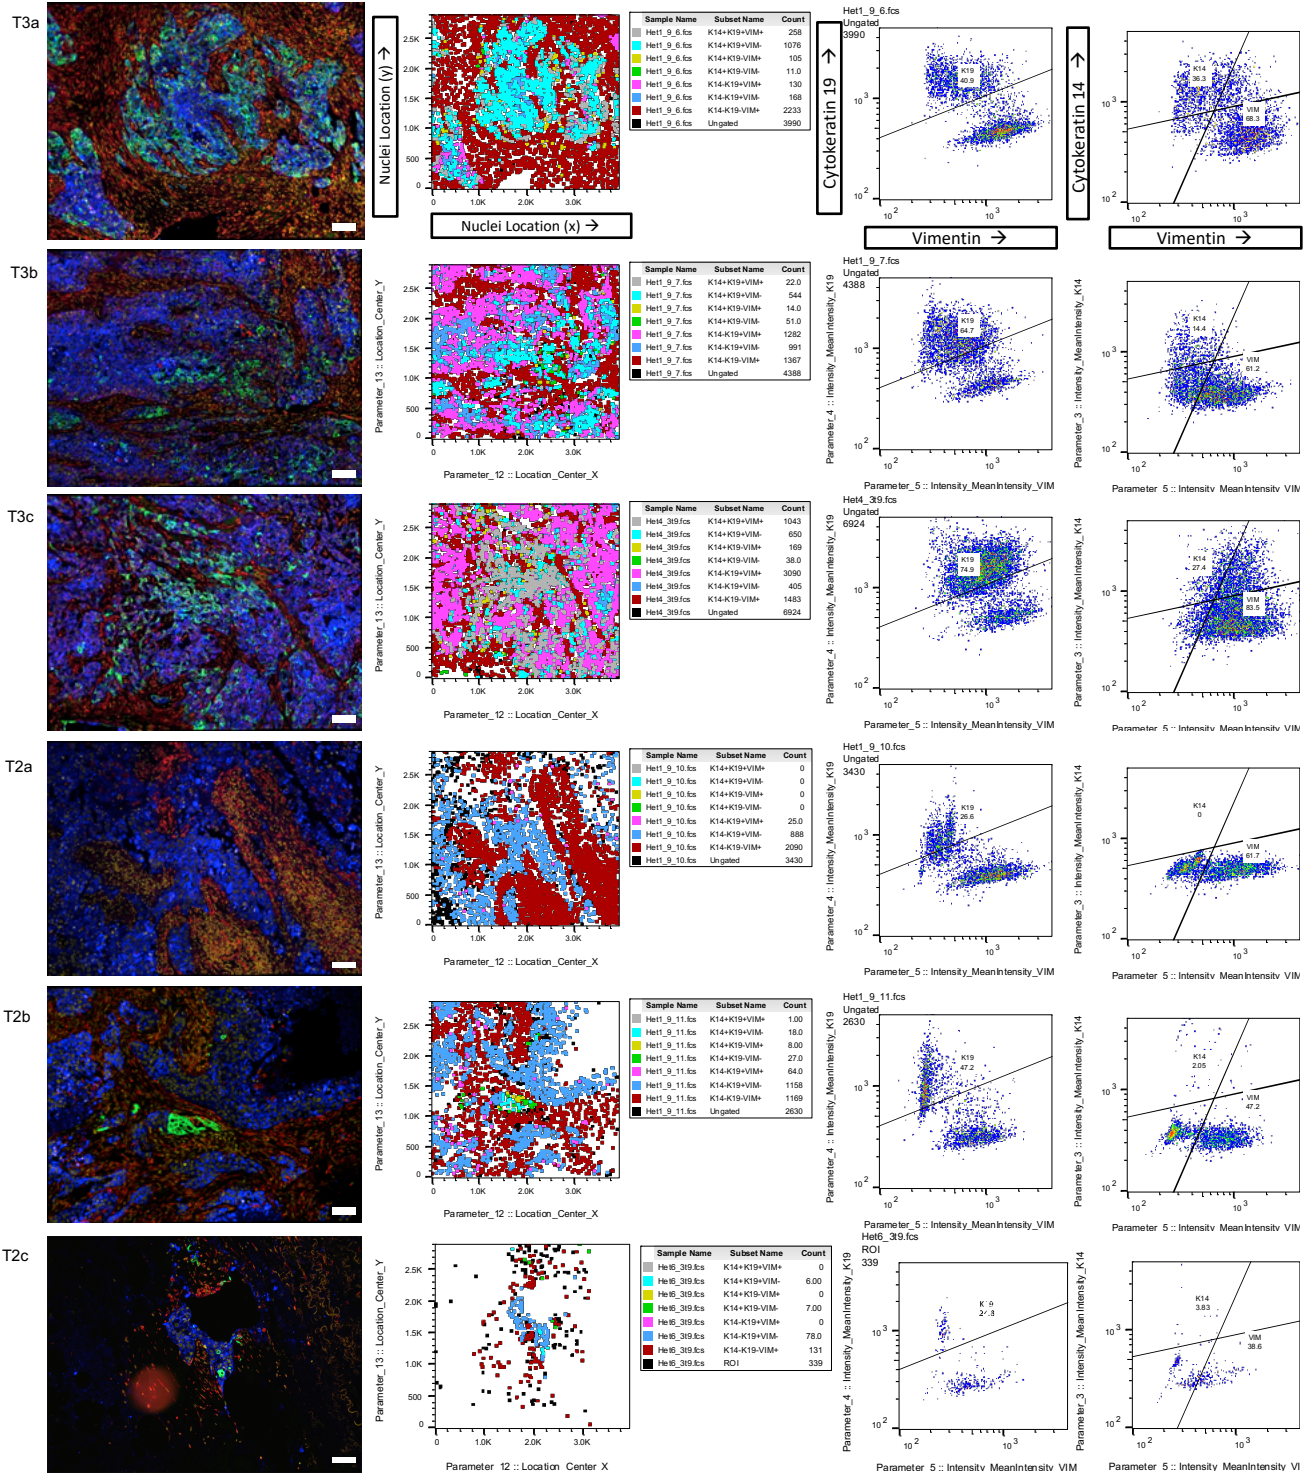

# Triple Negative Tumors

IF: DAPI K19 K14 VIM

Cell Phenotype

(K19 / K14 / VIM): + / - / - - / + / - - / - / + + / - / + + / + / + + - / - / -

T1a

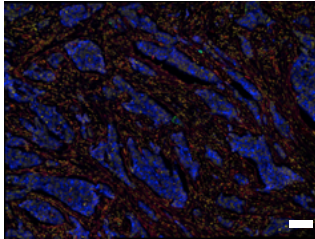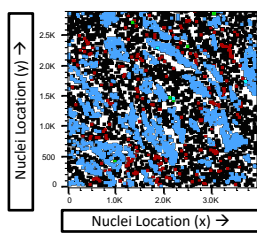

| Sample Name  | Subset Name  | Count |
|--------------|--------------|-------|
| Hett_9_8.fcs | K14+K19+VIM+ | 0     |
| Hett_9_8.fcs | K14+K19+VIM- | 3,000 |
| Hett_9_8.fcs | K14-K19+VIM+ | 0     |
| Hett_9_8.fcs | K14-K19+VIM- | 6,000 |
| Hett_9_8.fcs | K14-K19-VIM+ | 0     |
| Hett_9_8.fcs | K14-K19-VIM- | 1,304 |
| Hett_9_8.fcs | K14-K19-VIM+ | 216   |
| Hett_9_8.fcs | Ungated      | 4,041 |

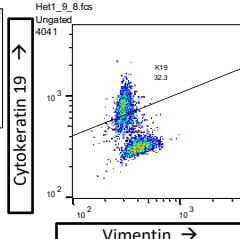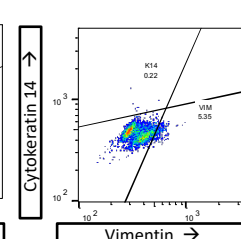

T1b

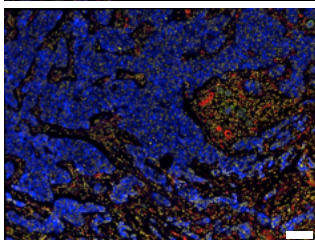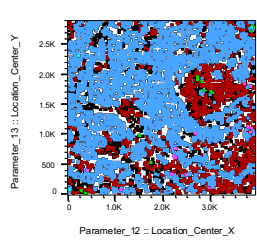

| Sample Name  | Subset Name  | Count |
|--------------|--------------|-------|
| Hett_9_9.fcs | K14+K19+VIM+ | 0     |
| Hett_9_9.fcs | K14+K19+VIM- | 3,000 |
| Hett_9_9.fcs | K14-K19+VIM+ | 0     |
| Hett_9_9.fcs | K14-K19+VIM- | 130   |
| Hett_9_9.fcs | K14-K19-VIM+ | 140   |
| Hett_9_9.fcs | K14-K19-VIM- | 2,713 |
| Hett_9_9.fcs | K14-K19-VIM+ | 966   |
| Hett_9_9.fcs | Ungated      | 4,438 |

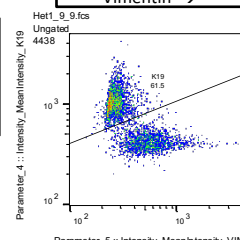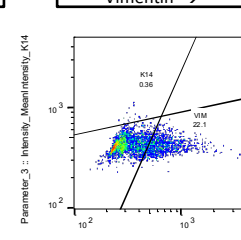

T1c

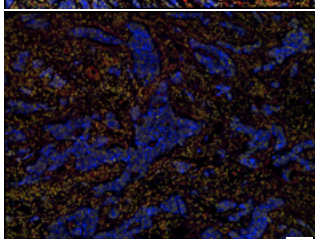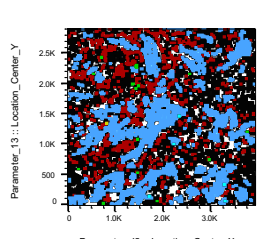

| Sample Name  | Subset Name  | Count |
|--------------|--------------|-------|
| Het5_119.fcs | K14+K19+VIM+ | 0     |
| Het5_119.fcs | K14+K19+VIM- | 5,000 |
| Het5_119.fcs | K14-K19+VIM+ | 1,000 |
| Het5_119.fcs | K14-K19+VIM- | 170   |
| Het5_119.fcs | K14-K19-VIM+ | 0     |
| Het5_119.fcs | K14-K19-VIM- | 2,471 |
| Het5_119.fcs | K14-K19-VIM+ | 917   |
| Het5_119.fcs | Ungated      | 8,077 |

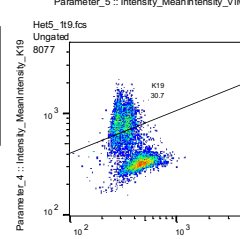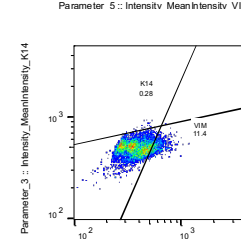

T4

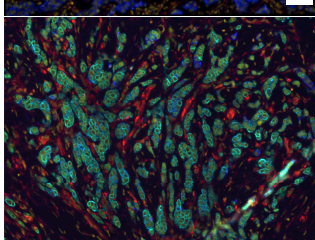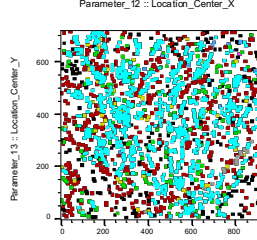

| Sample Name        | Subset Name  | Count |
|--------------------|--------------|-------|
| 48861 tnc3 3x3.fcs | K14+K19+VIM+ | 751   |
| 48861 tnc3 3x3.fcs | K14+K19+VIM- | 150   |
| 48861 tnc3 3x3.fcs | K14-K19+VIM+ | 510   |
| 48861 tnc3 3x3.fcs | K14-K19+VIM- | 147   |
| 48861 tnc3 3x3.fcs | K14-K19-VIM+ | 1,000 |
| 48861 tnc3 3x3.fcs | K14-K19-VIM- | 150   |
| 48861 tnc3 3x3.fcs | K14-K19-VIM+ | 426   |
| 48861 tnc3 3x3.fcs | Ungated      | 1,660 |

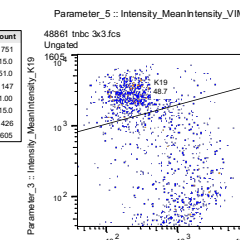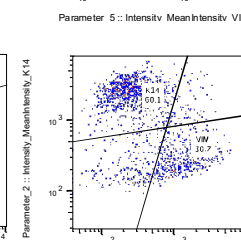

T5

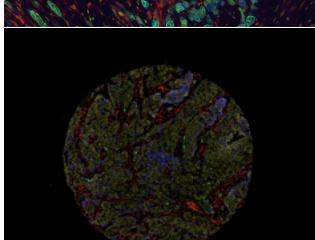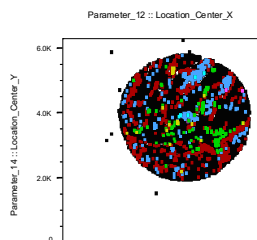

| Sample Name           | Subset Name  | Count |
|-----------------------|--------------|-------|
| SpotMergeFCsready.fcs | K14+K19+VIM+ | 0     |
| SpotMergeFCsready.fcs | K14+K19+VIM- | 5,000 |
| SpotMergeFCsready.fcs | K14-K19+VIM+ | 190   |
| SpotMergeFCsready.fcs | K14-K19+VIM- | 119   |
| SpotMergeFCsready.fcs | K14-K19-VIM+ | 3,000 |
| SpotMergeFCsready.fcs | K14-K19-VIM- | 276   |
| SpotMergeFCsready.fcs | K14-K19-VIM+ | 582   |
| SpotMergeFCsready.fcs | Ungated      | 5,487 |

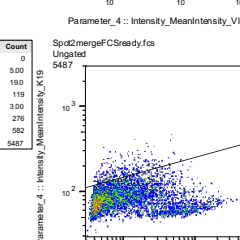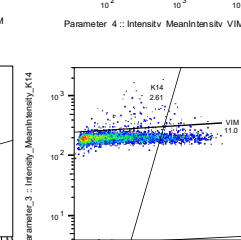

T6

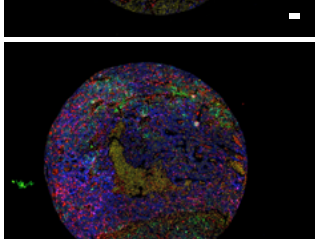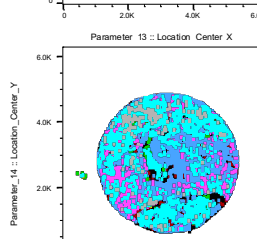

| Sample Name           | Subset Name  | Count |
|-----------------------|--------------|-------|
| SpotMergeFCsready.fcs | K14+K19+VIM+ | 167   |
| SpotMergeFCsready.fcs | K14+K19+VIM- | 1,993 |
| SpotMergeFCsready.fcs | K14-K19+VIM+ | 800   |
| SpotMergeFCsready.fcs | K14-K19+VIM- | 100   |
| SpotMergeFCsready.fcs | K14-K19-VIM+ | 601   |
| SpotMergeFCsready.fcs | K14-K19-VIM- | 3,937 |
| SpotMergeFCsready.fcs | K14-K19-VIM+ | 377   |
| SpotMergeFCsready.fcs | Ungated      | 8,607 |

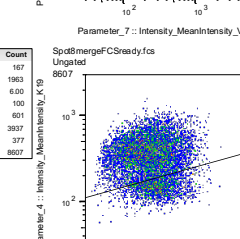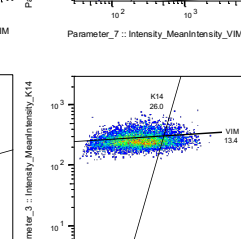

T7

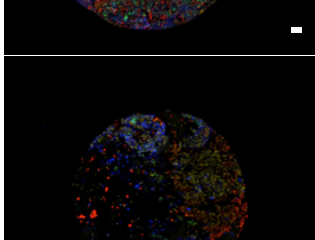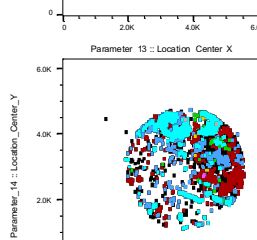

| Sample Name           | Subset Name  | Count  |
|-----------------------|--------------|--------|
| SpotMergeFCsready.fcs | K14+K19+VIM+ | 200    |
| SpotMergeFCsready.fcs | K14+K19+VIM- | 563    |
| SpotMergeFCsready.fcs | K14-K19+VIM+ | 6,000  |
| SpotMergeFCsready.fcs | K14-K19+VIM- | 540    |
| SpotMergeFCsready.fcs | K14-K19-VIM+ | 1,110  |
| SpotMergeFCsready.fcs | K14-K19-VIM- | 356    |
| SpotMergeFCsready.fcs | K14-K19-VIM+ | 408    |
| SpotMergeFCsready.fcs | Ungated      | 10,280 |

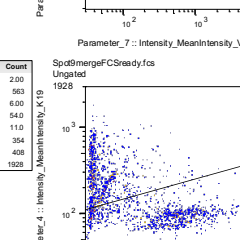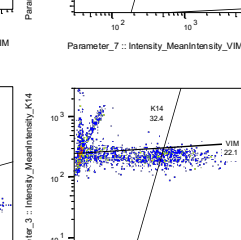

### Triple Negative Tumors

IF: DAPI K19 K14 VIM

Cell Phenotype

(K19 / K14 / VIM): + / - / - - / + / - - / - / + + / - / + - / + / - - / + / + - / - / + / + + / + / + + - / - / -

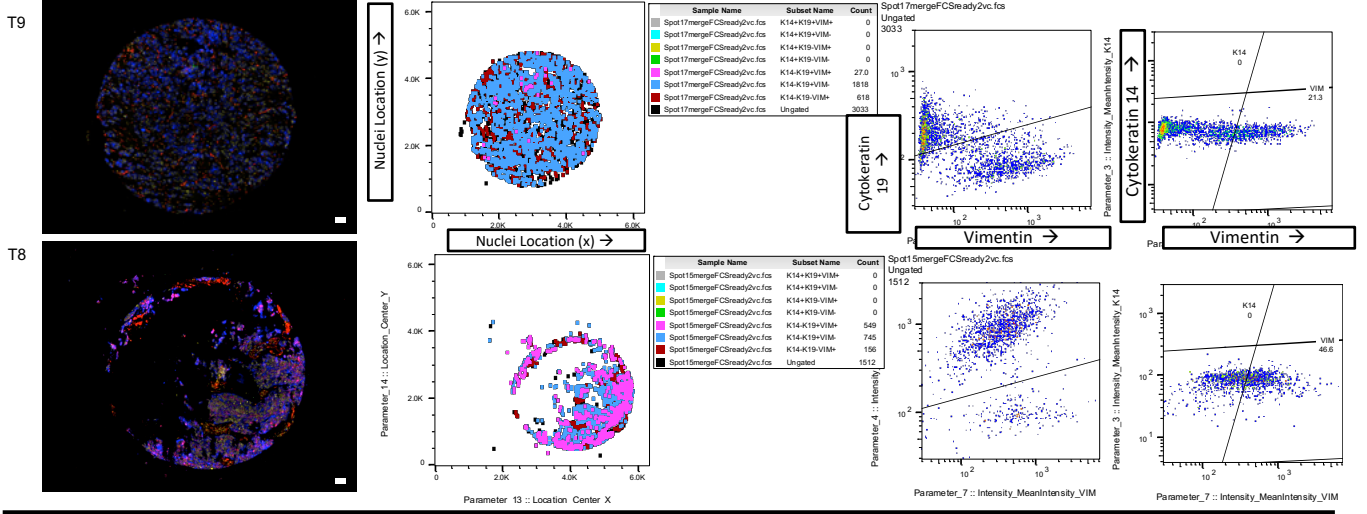

### HER2+ Tumors

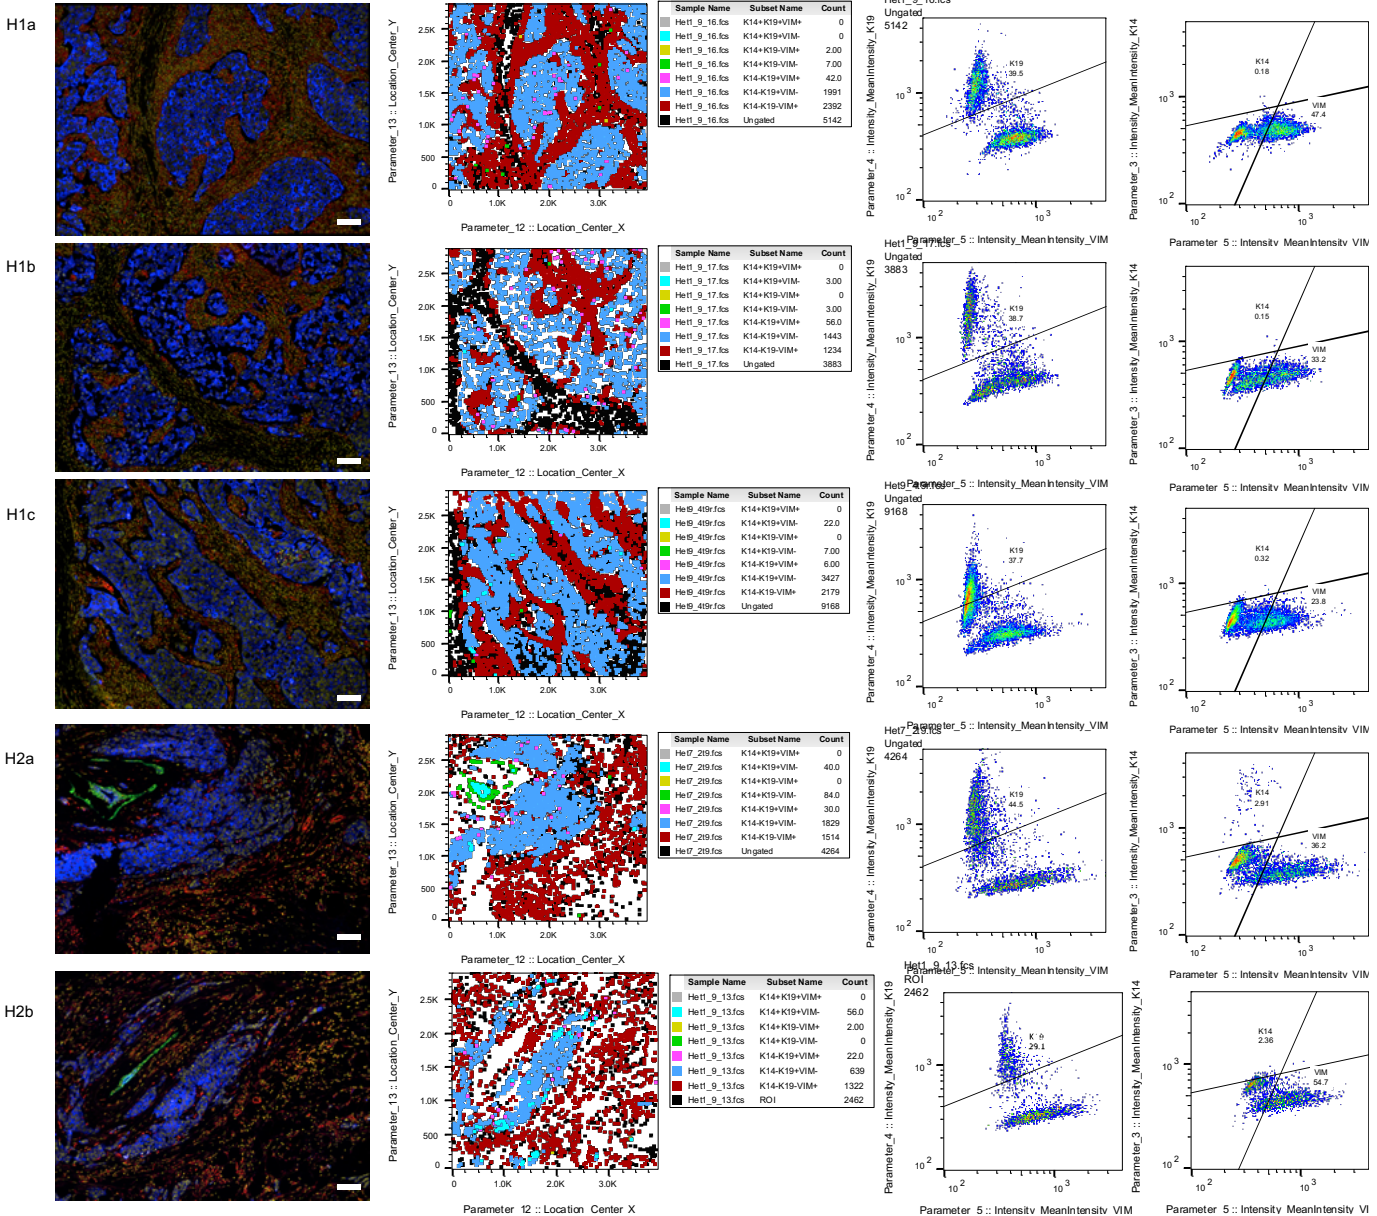

## HER2+ Tumors

IF: DAPI K19 K14 VIM

Cell Phenotype

(K19/K14/VIM): +/+/+ -/+/- -/+/- -/+/- +/+/+ +/+/+ -/+/-

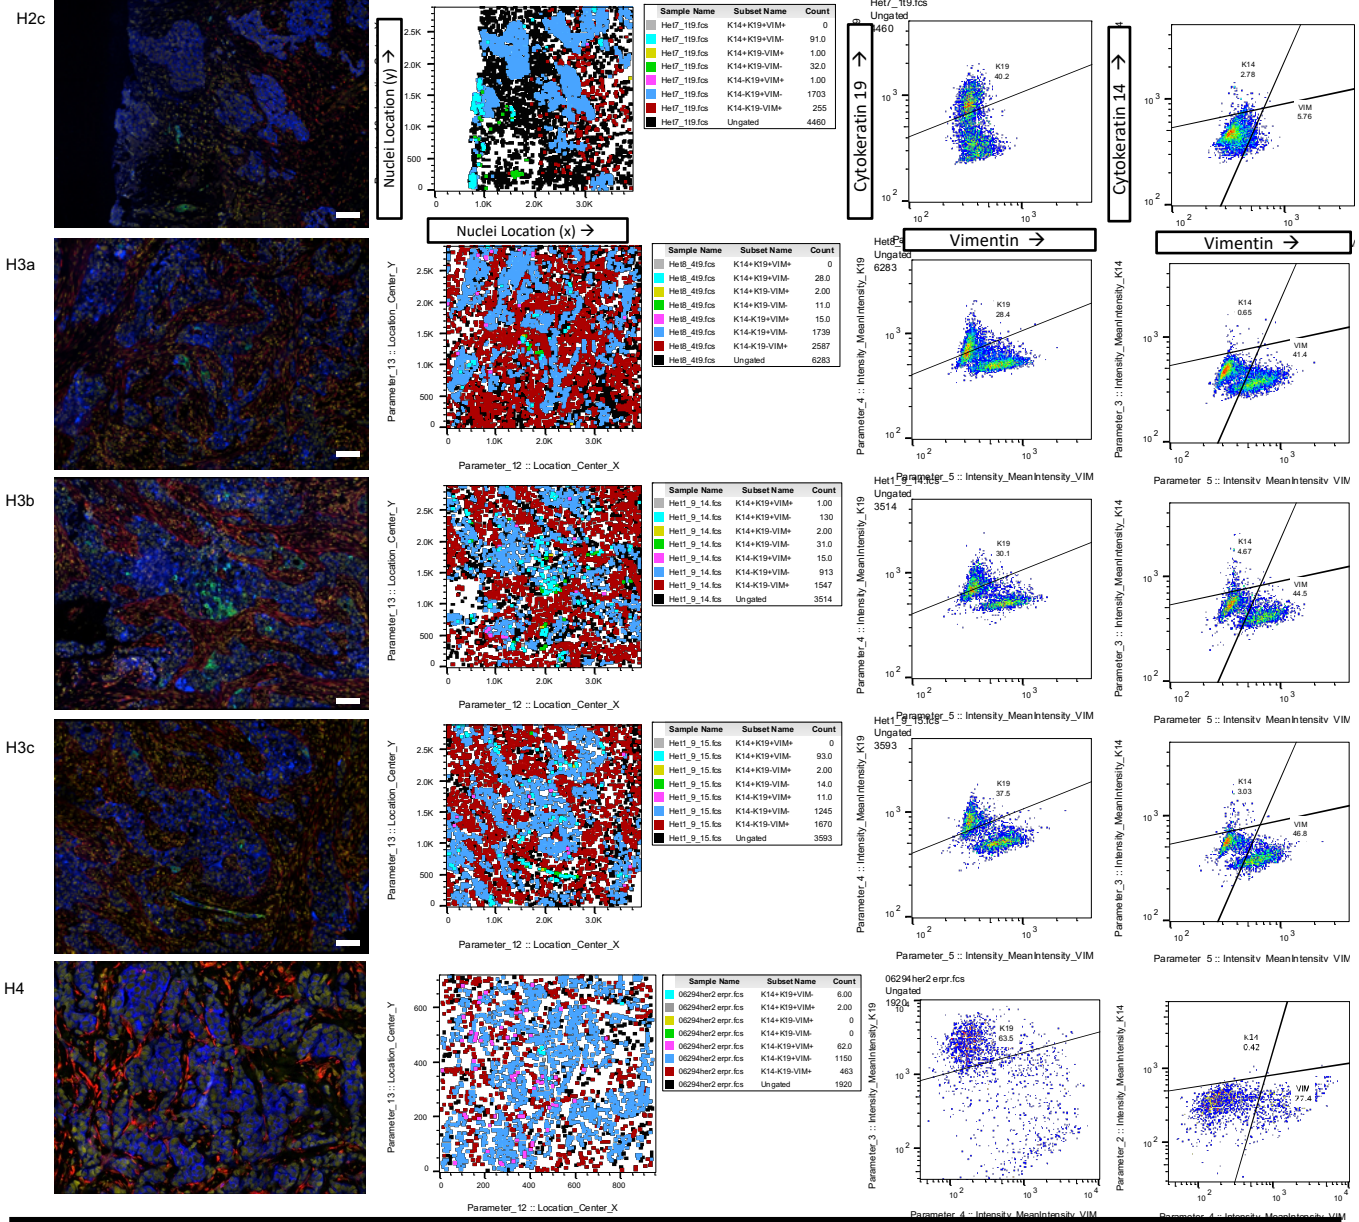

## ER+ Tumors

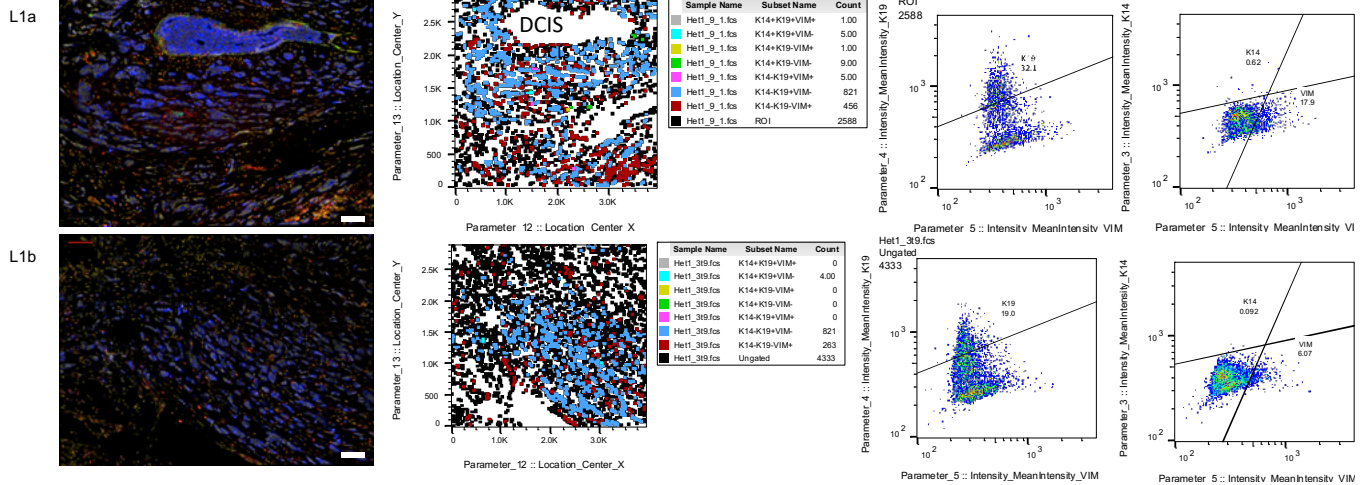

# Luminal Tumors

IF: DAPI K19 K14 VIM

Cell Phenotype (K19 / K14 / VIM):

■ +/+/+ 
 ■ +/+/- 
 ■ -/+/- 
 ■ -/+/+ 
 ■ +/+/- 
 ■ -/+/+ 
 ■ +/+/+ 
 ■ -/-/-

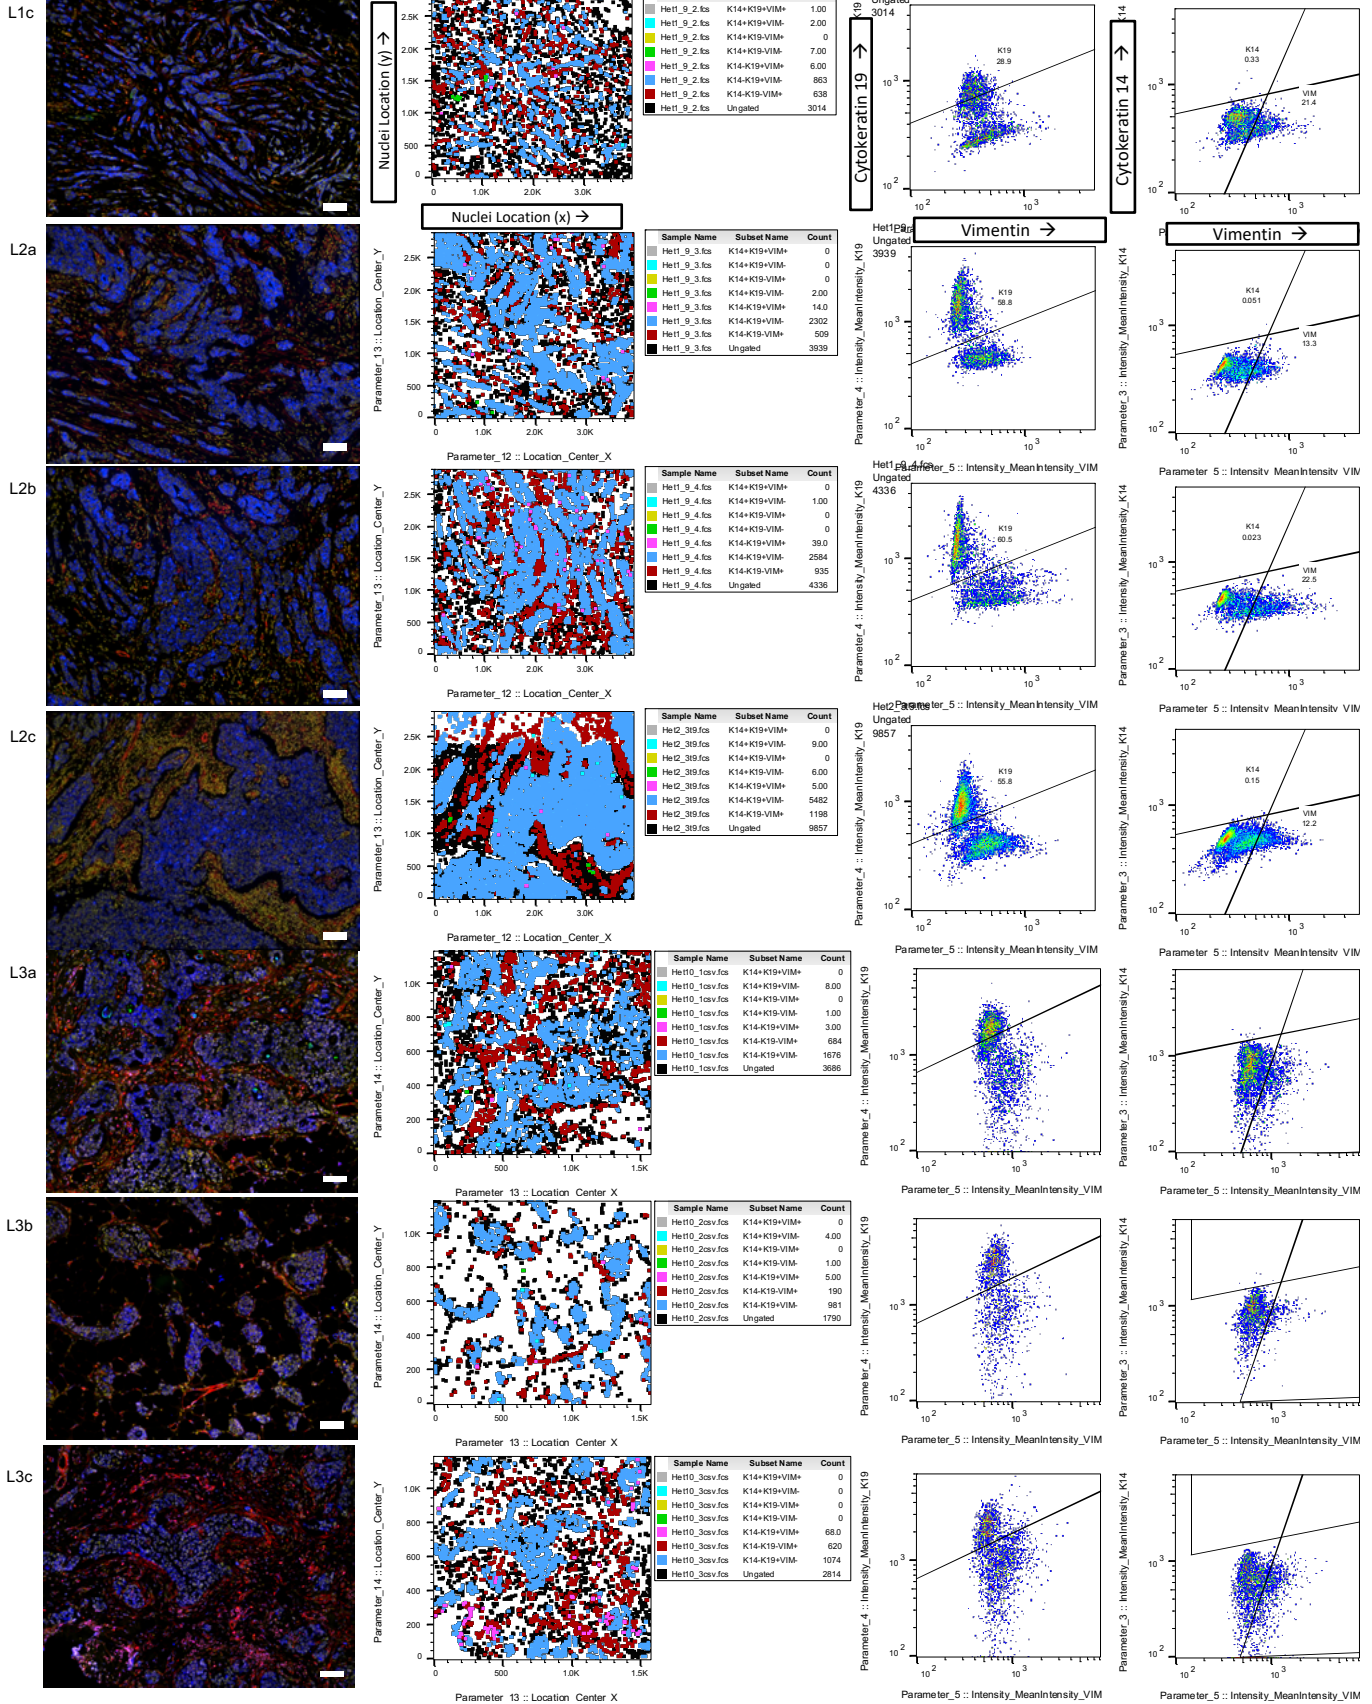

# Luminal Tumors

IF: DAPI K19 K14 VIM

Cell Phenotype

(K19 / K14 / VIM): + / - / - - / + / - - / - / + - / - / + + / + / + - / - / -

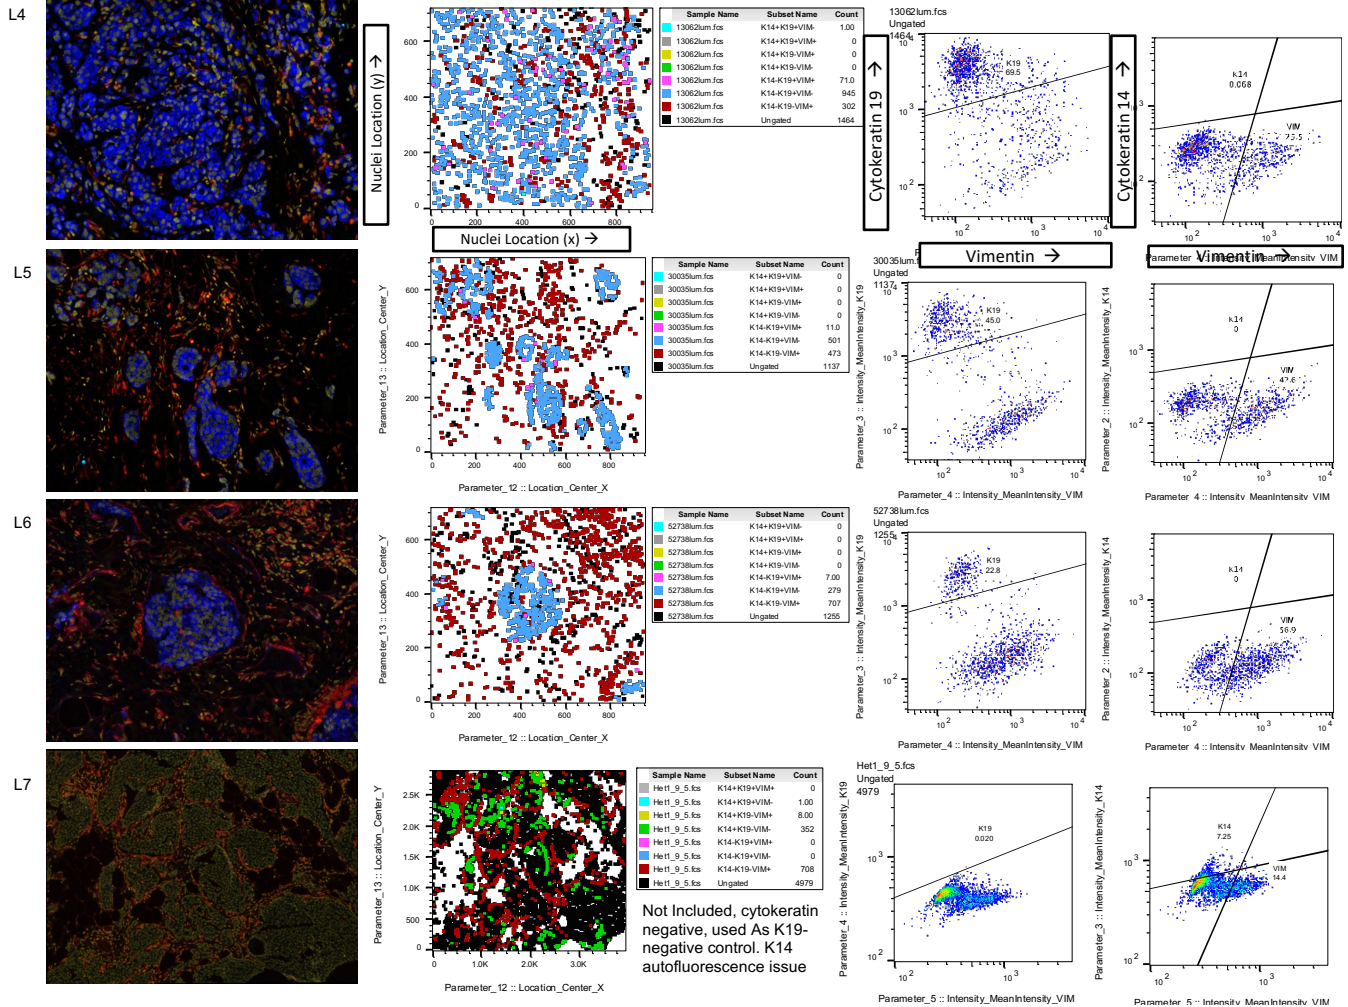

# Patient-Derived Xenograft Tumors

Ku80+ Tumor Cell Phenotype (K19 / K14 / VIM):

IF:  DAPI  K19  K14  VIM  Ku80

■ + / - / -   
 ■ - / + / -   
 ■ - / - / +   
 ■ + / - / +   
 ■ + / + / -   
 ■ - / + / +   
 ■ + / + / +   
 ■ Ku80-negative cell

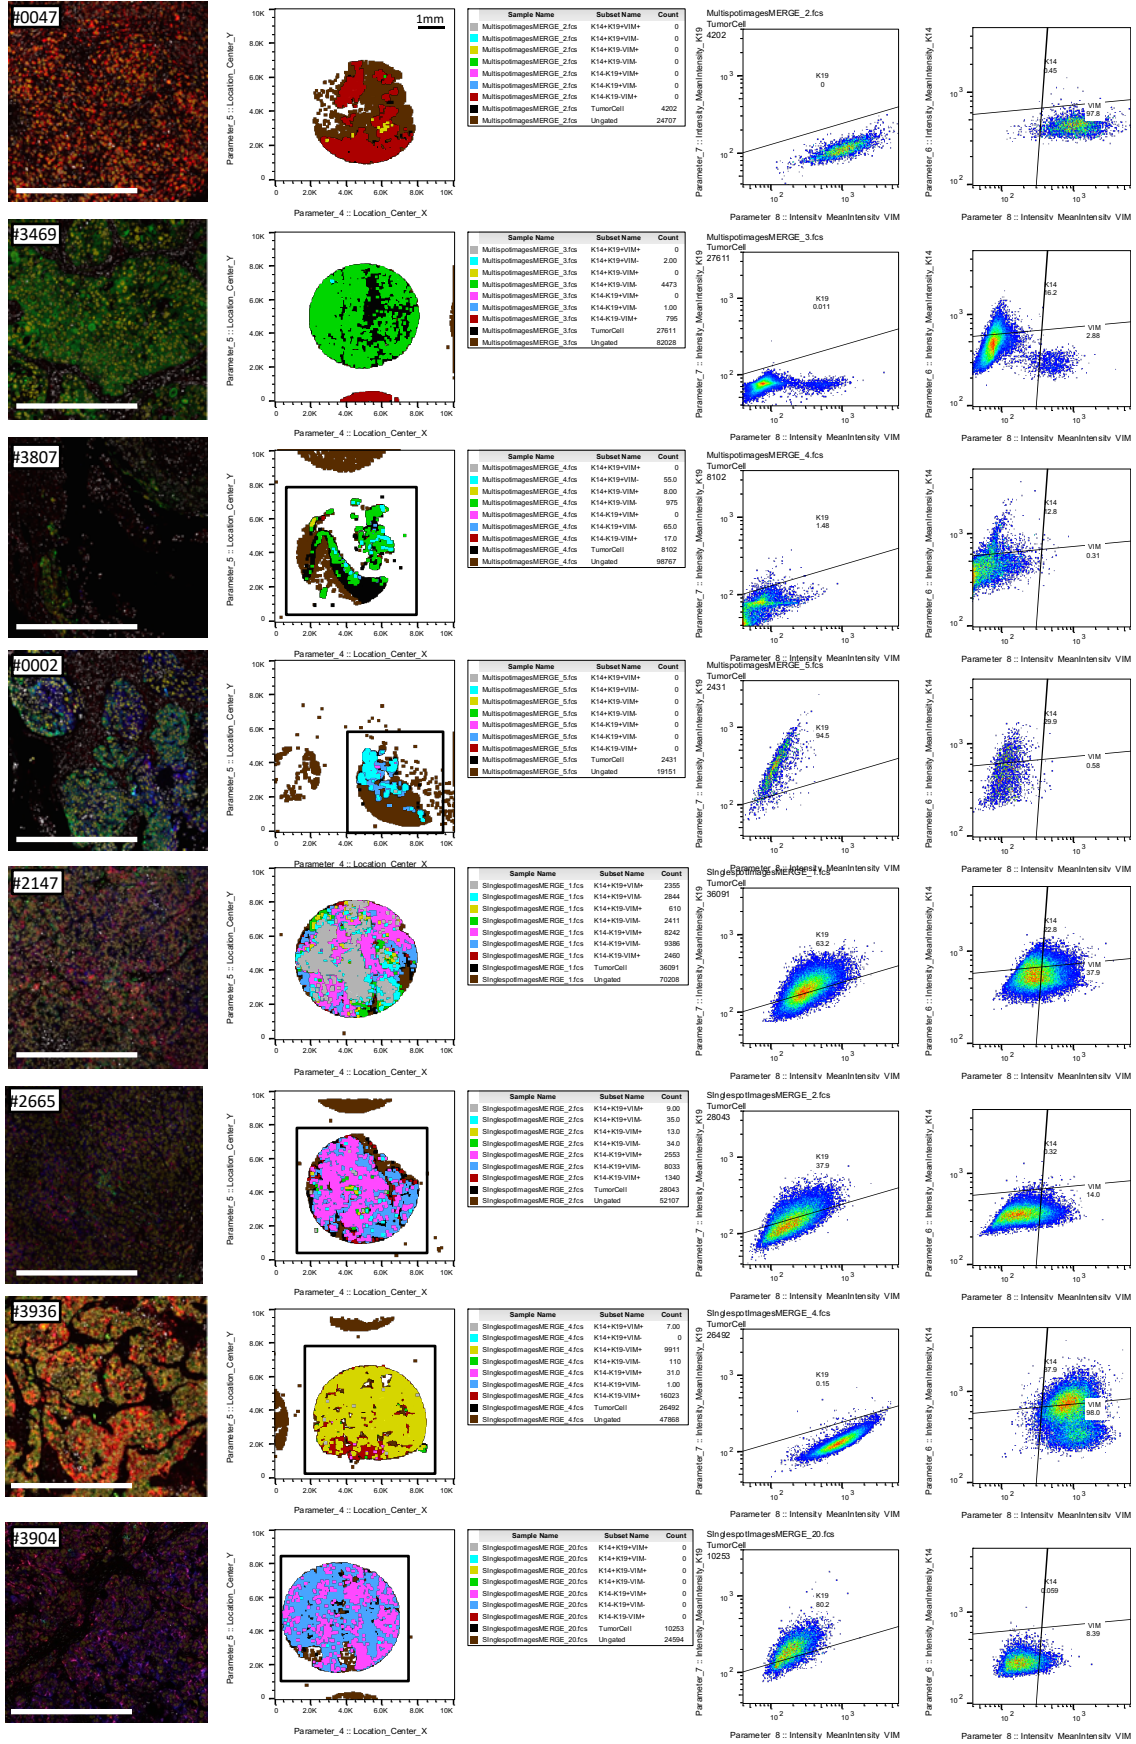



# Patient-Derived Xenograft Tumors

Ku80+ Tumor Cell Phenotype

(K19 / K14 / VIM):

■ + / - / -   
 ■ - / + / -   
 ■ - / - / +   
 ■ + / - / +   
 ■ + / + / -   
 ■ - / + / +   
 ■ + / + / +

IF: ■ DAPI ■ K19 ■ K14 ■ VIM ■ Ku80

■ Ku80-negative cell

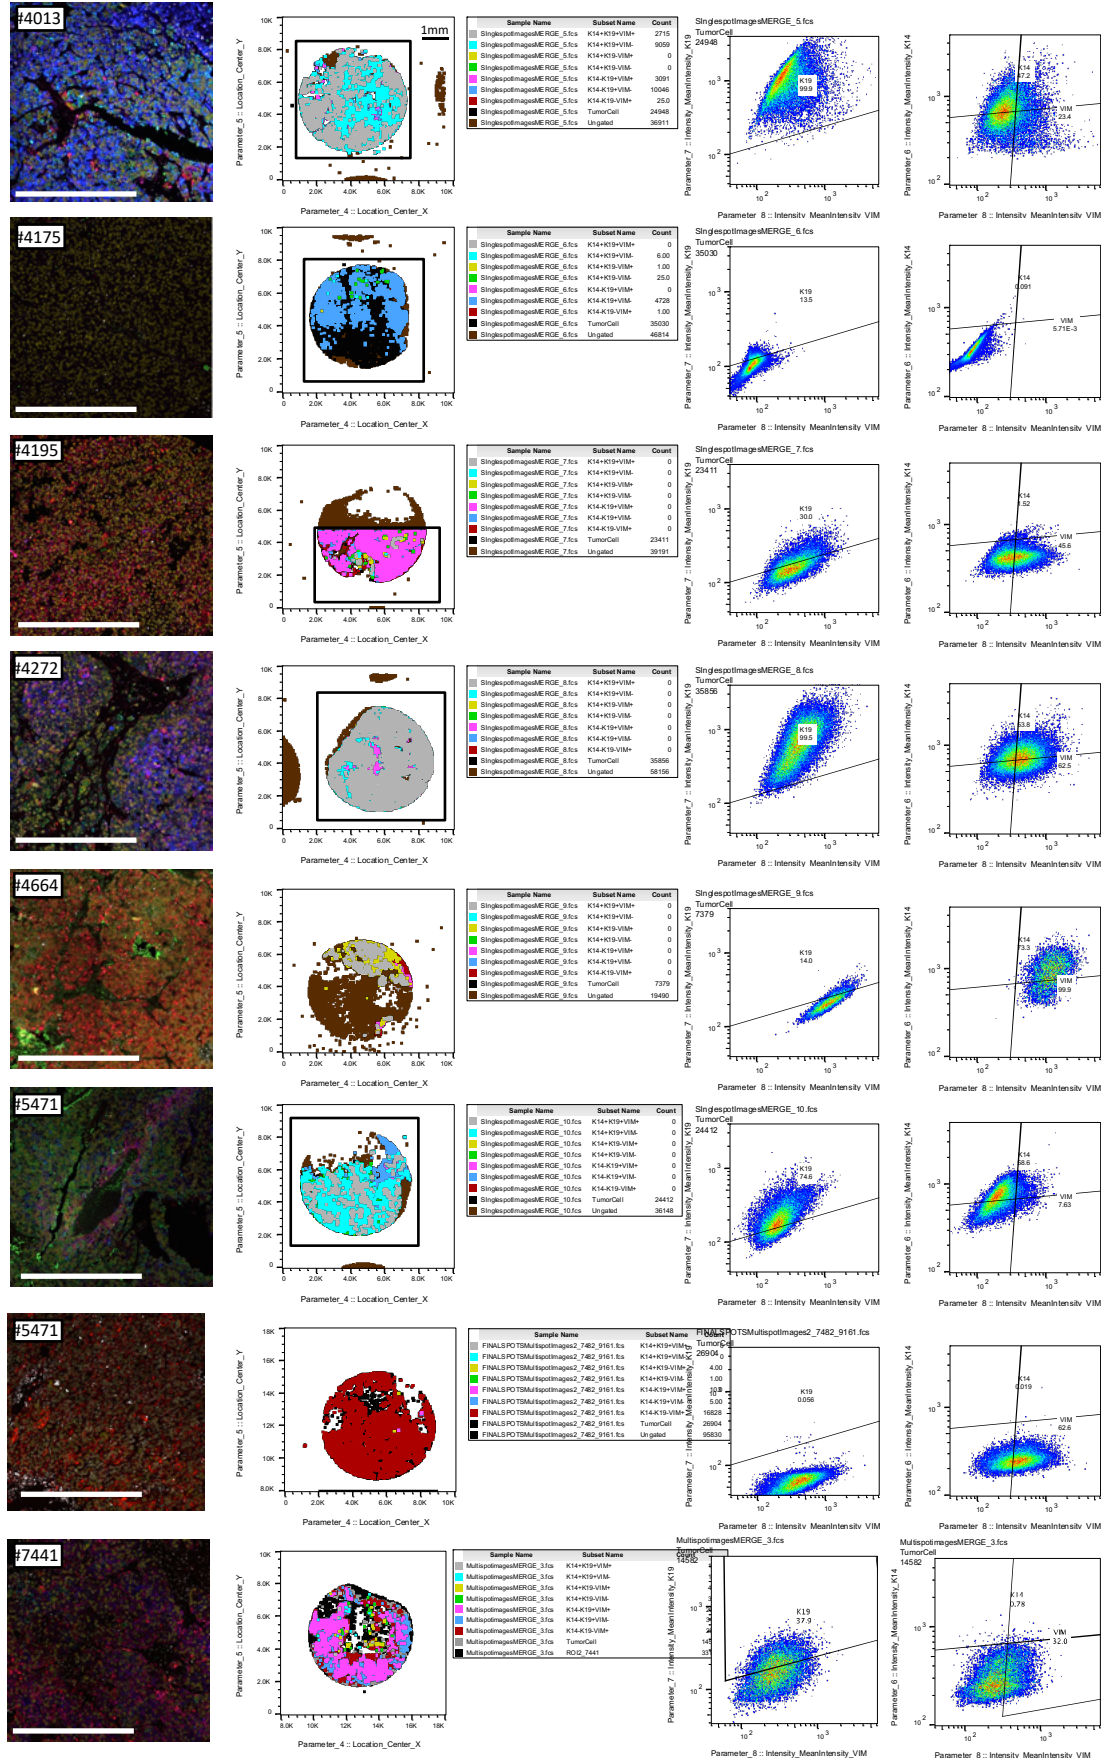

# Patient-Derived Xenograft Tumors

## Ku80+ Tumor Cell Phenotype (K19 / K14 / VIM):

IF:  DAPI  K19  K14  VIM  Ku80

■ + / - / - ■ - / + / - ■ - / - / + ■ + / - / + ■ + / + / - ■ - / + / + ■ + / + / +  
■ Ku80-negative cell

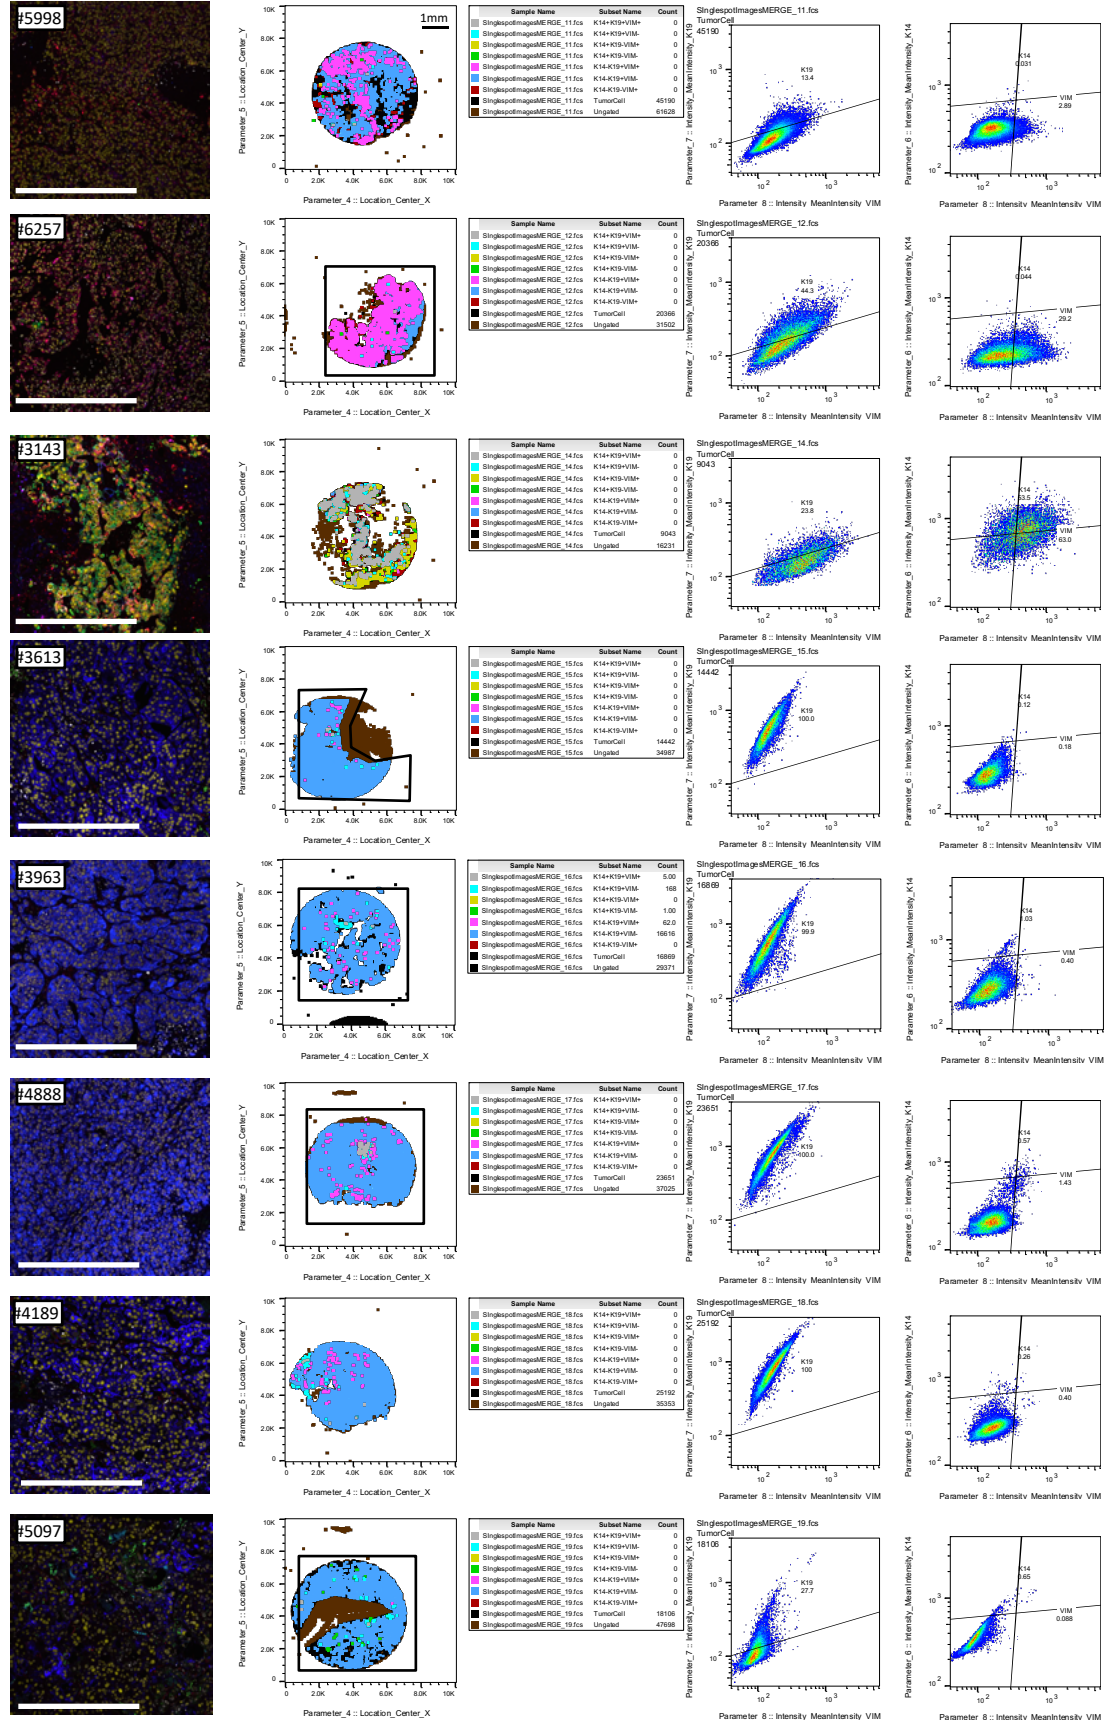

# Patient-Derived Xenograft Tumors

Ku80+ Tumor Cell Phenotype

(K19 / K14 / VIM): ■ + / - / - ■ - / + / - ■ - / - / + ■ + / - / + ■ + / + / - ■ - / + / + ■ + / + / +

IF: ■ DAPI ■ K19 ■ K14 ■ VIM ■ Ku80

■ Ku80-negative cell

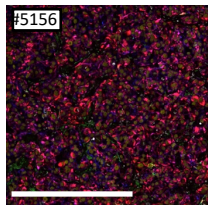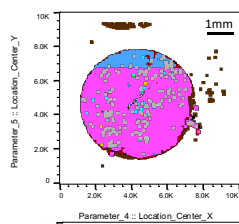

| Sample Name                 | Subst Name   | Count |
|-----------------------------|--------------|-------|
| SinglespotImageMERGE_21.fcs | K14+K19-VIM+ | 0     |
| SinglespotImageMERGE_21.fcs | K14+K19-VIM- | 0     |
| SinglespotImageMERGE_21.fcs | K14+K19-VIM+ | 0     |
| SinglespotImageMERGE_21.fcs | K14+K19-VIM- | 0     |
| SinglespotImageMERGE_21.fcs | K14+K19-VIM+ | 0     |
| SinglespotImageMERGE_21.fcs | K14+K19-VIM- | 0     |
| SinglespotImageMERGE_21.fcs | K14+K19-VIM+ | 0     |
| SinglespotImageMERGE_21.fcs | K14+K19-VIM- | 0     |
| SinglespotImageMERGE_21.fcs | TumorCell    | 2176  |
| SinglespotImageMERGE_21.fcs | Un gated     | 39487 |

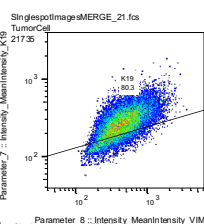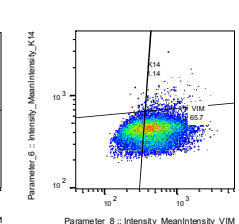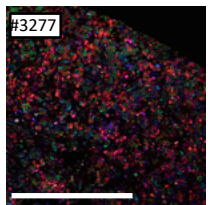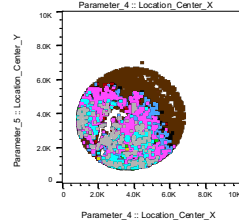

| Sample Name                 | Subst Name   | Count |
|-----------------------------|--------------|-------|
| SinglespotImageMERGE_25.fcs | K14+K19-VIM+ | 0     |
| SinglespotImageMERGE_25.fcs | K14+K19-VIM- | 0     |
| SinglespotImageMERGE_25.fcs | K14+K19-VIM+ | 0     |
| SinglespotImageMERGE_25.fcs | K14+K19-VIM- | 0     |
| SinglespotImageMERGE_25.fcs | K14+K19-VIM+ | 0     |
| SinglespotImageMERGE_25.fcs | K14+K19-VIM- | 0     |
| SinglespotImageMERGE_25.fcs | K14+K19-VIM+ | 0     |
| SinglespotImageMERGE_25.fcs | K14+K19-VIM- | 0     |
| SinglespotImageMERGE_25.fcs | TumorCell    | 6392  |
| SinglespotImageMERGE_25.fcs | Un gated     | 34244 |

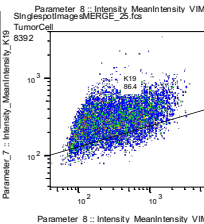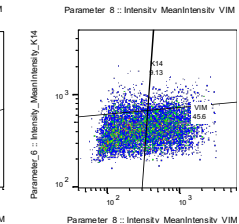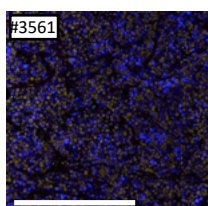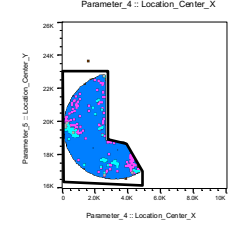

| Sample Name              | Subst Name   | Count | Workspace Annotation |
|--------------------------|--------------|-------|----------------------|
| MultipotImageMERGE_4.fcs | K14+K19-VIM+ | 720   |                      |
| MultipotImageMERGE_4.fcs | K14+K19-VIM- | 101   |                      |
| MultipotImageMERGE_4.fcs | K14+K19-VIM+ | 0     |                      |
| MultipotImageMERGE_4.fcs | K14+K19-VIM- | 147   |                      |
| MultipotImageMERGE_4.fcs | K14+K19-VIM+ | 2006  |                      |
| MultipotImageMERGE_4.fcs | K14+K19-VIM- | 733   |                      |
| MultipotImageMERGE_4.fcs | TumorCell    | 20423 |                      |
| MultipotImageMERGE_4.fcs | Un gated     | 27664 |                      |

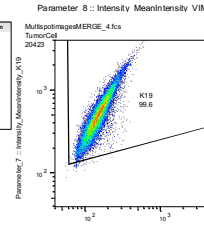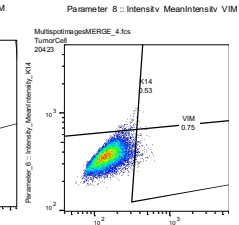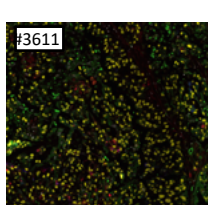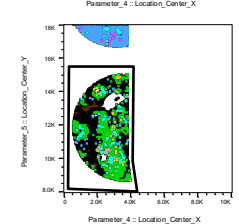

| Sample Name              | Subst Name   | Count |
|--------------------------|--------------|-------|
| MultipotImageMERGE_4.fcs | K14+K19-VIM+ | 663   |
| MultipotImageMERGE_4.fcs | K14+K19-VIM- | 346   |
| MultipotImageMERGE_4.fcs | K14+K19-VIM+ | 103   |
| MultipotImageMERGE_4.fcs | K14+K19-VIM- | 2132  |
| MultipotImageMERGE_4.fcs | K14+K19-VIM+ | 152   |
| MultipotImageMERGE_4.fcs | K14+K19-VIM- | 1922  |
| MultipotImageMERGE_4.fcs | K14+K19-VIM+ | 232   |
| MultipotImageMERGE_4.fcs | K14+K19-VIM- | 848   |
| MultipotImageMERGE_4.fcs | Un gated     | 48643 |

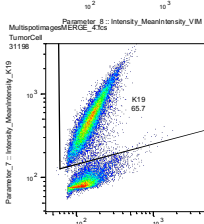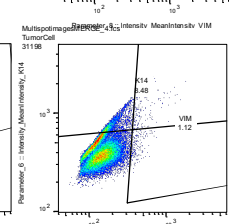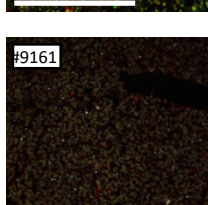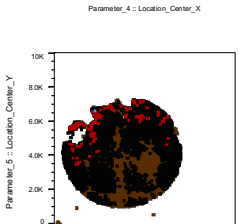

| Sample Name                 | Subst Name   | Count |
|-----------------------------|--------------|-------|
| SinglespotImageMERGE_24.fcs | K14+K19-VIM+ | 0     |
| SinglespotImageMERGE_24.fcs | K14+K19-VIM- | 0     |
| SinglespotImageMERGE_24.fcs | K14+K19-VIM+ | 0     |
| SinglespotImageMERGE_24.fcs | K14+K19-VIM- | 0     |
| SinglespotImageMERGE_24.fcs | K14+K19-VIM+ | 0     |
| SinglespotImageMERGE_24.fcs | K14+K19-VIM- | 0     |
| SinglespotImageMERGE_24.fcs | K14+K19-VIM+ | 0     |
| SinglespotImageMERGE_24.fcs | K14+K19-VIM- | 0     |
| SinglespotImageMERGE_24.fcs | TumorCell    | 16112 |
| SinglespotImageMERGE_24.fcs | Un gated     | 54520 |

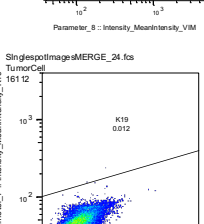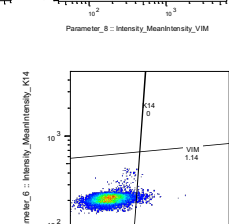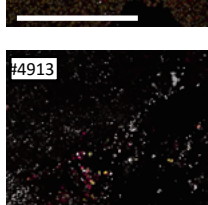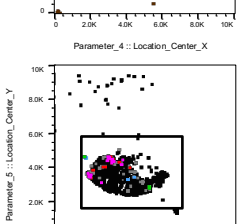

| Sample Name                             | Subst Name   | Count |
|-----------------------------------------|--------------|-------|
| FNALS POTSMultipotImages1_4175_4913.fcs | K14+K19-VIM+ | 131   |
| FNALS POTSMultipotImages1_4175_4913.fcs | K14+K19-VIM- | 0     |
| FNALS POTSMultipotImages1_4175_4913.fcs | K14+K19-VIM+ | 300   |
| FNALS POTSMultipotImages1_4175_4913.fcs | K14+K19-VIM- | 221   |
| FNALS POTSMultipotImages1_4175_4913.fcs | K14+K19-VIM+ | 190   |
| FNALS POTSMultipotImages1_4175_4913.fcs | K14+K19-VIM- | 131   |
| FNALS POTSMultipotImages1_4175_4913.fcs | TumorCell    | 5342  |
| FNALS POTSMultipotImages1_4175_4913.fcs | Un gated     | 5342  |

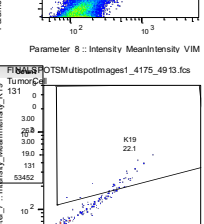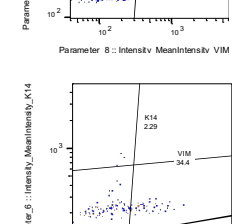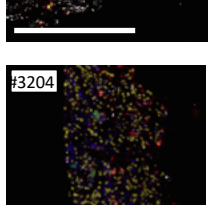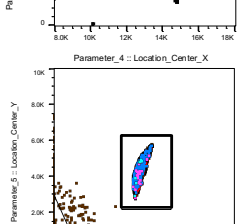

| Sample Name              | Subst Name   | Count |
|--------------------------|--------------|-------|
| MultipotImageMERGE_5.fcs | K14+K19-VIM+ | 0     |
| MultipotImageMERGE_5.fcs | K14+K19-VIM- | 800   |
| MultipotImageMERGE_5.fcs | K14+K19-VIM+ | 100   |
| MultipotImageMERGE_5.fcs | K14+K19-VIM- | 34    |
| MultipotImageMERGE_5.fcs | K14+K19-VIM+ | 253   |
| MultipotImageMERGE_5.fcs | K14+K19-VIM- | 34    |
| MultipotImageMERGE_5.fcs | K14+K19-VIM+ | 73    |
| MultipotImageMERGE_5.fcs | K14+K19-VIM- | 94    |
| MultipotImageMERGE_5.fcs | TumorCell    | 94    |
| MultipotImageMERGE_5.fcs | Un gated     | 1919  |

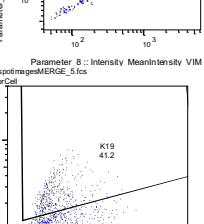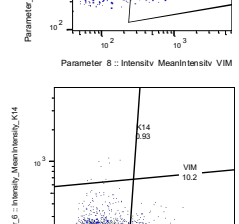

Supplement: 41467_2018_5729_MOESM4_ESM.pdf [file 41467_2018_5729_MOESM4_ESM.pdf]
