# Supplementary material for: Differentiation-state plasticity is a targetable resistance mechanism in basal-like breast cancer
Source: PubMed Central journal article supplement (PMC6145927; doi:10.1038/s41467-018-05729-w), 2018-09-19
Supplement: 41467_2018_5729_MOESM1_ESM.pdf [file 41467_2018_5729_MOESM1_ESM.pdf]

# Differentiation-state plasticity is a targetable resistance mechanism in basal-like breast cancer

Risom et al.

## **Supplementary Information**

**Pg. 2-25 Supplementary Figures 1-15**  
**Pg. 26-28 Supplementary Tables 1 and 2**  
**Pg. 29-33 Supplementary Methods**

# Supplementary Figure 1 | Measuring differentiation-state heterogeneity in primary breast tumors and patient-derived xenograft tumors of different histological subtype.

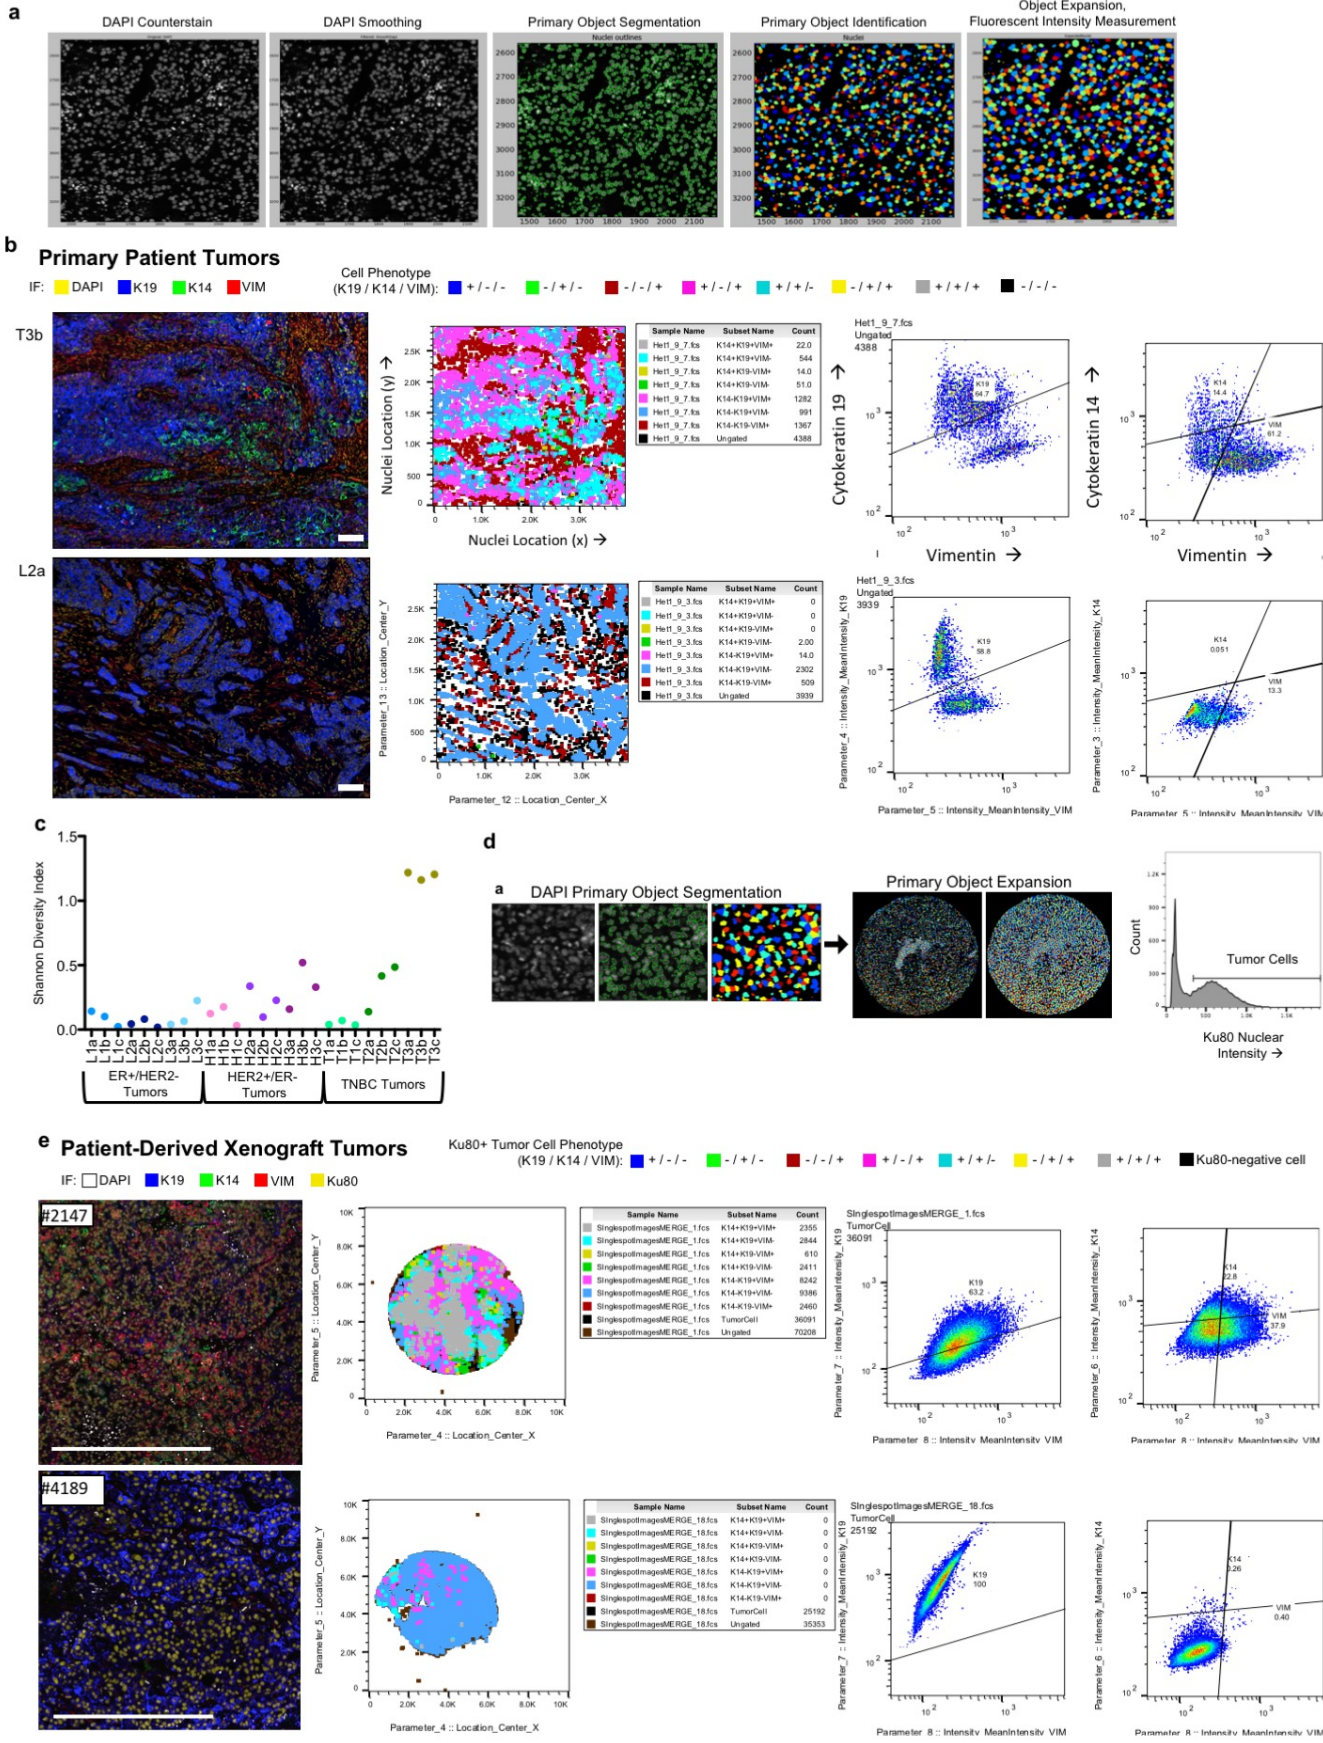

**Supplementary Figure 1. Measuring differentiation-state heterogeneity in primary breast tumors and patient-derived xenograft tumors of different histological subtype.**

(a) Schematic showing the Cell Profiler workflow to measure single cell intensity of cell-state marker expression in 4-color-IF images of FFPE primary tumor samples. DAPI signal is smoothed and single nuclei are segmented, and an expanded annulus from each nucleus is used to measure signal intensity from the 488, 568, and 647 channels. (b) Two examples of primary patient tumors and the resulting analyses to determine single cell phenotype. Left panel: 4-color IF images of treatment-naïve breast tumors showing DAPI (yellow), K19 (blue), K14 (green) and VIM (red). Middle panel: An x/y dotplot showing single cell location and cell phenotype by color, with an accompanying legend with phenotype counts. Right Panel: dot plots comparing single cell intensity of K19 vs. VIM, and K14 vs. VIM with positivity gates shown. Tumor name is given to the left of the IF image, different regions of the same tumor are denoted by letter e.g. T3a, T3b, T3c. See Supplementary Dataset 1 for all additional tumors; T = TNBC, L = Luminal (ER+/PR+). Scale bars = 100 $\mu$ m. (c) The Shannon diversity index was calculated using K19/K14/VIM differentiation-state frequencies in each tumor and displayed, with tumors grouped by histological subtype. Color denotes individual tumors, with three regions of each tumor analyzed. (d) Schematic showing the Cell Profiler workflow to measure single cell intensity of cell-state marker expression in 4-color-IF images of patient-derived xenograft tissue microarray spots, Ku80 gating is used to identify human tumor cells. (e) Two examples of patient-derived xenograft tumors and the resulting analyses to determine single cell phenotype. Left panel: 4-color IF images of patient-derived xenograft tumors showing DAPI (yellow), K19 (blue), K14 (green) and VIM (red), scale bars = 100 $\mu$ m. Middle panel: An x/y dotplot showing single cell location and cell phenotype by color in each tissue-microarray spot analyzed, with an accompanying legend with phenotype counts. Only human Ku80+ tumor cells were analyzed for K19/K14/VIM positivity, non-tumor cells are shown in black. Right Panel: dot plots comparing single tumor cell intensity of K19 vs. VIM, and K14 vs. VIM, with positivity gates shown.

Supplementary Figure 2 | Interrogating differentiation state heterogeneity in breast cancer cell lines.

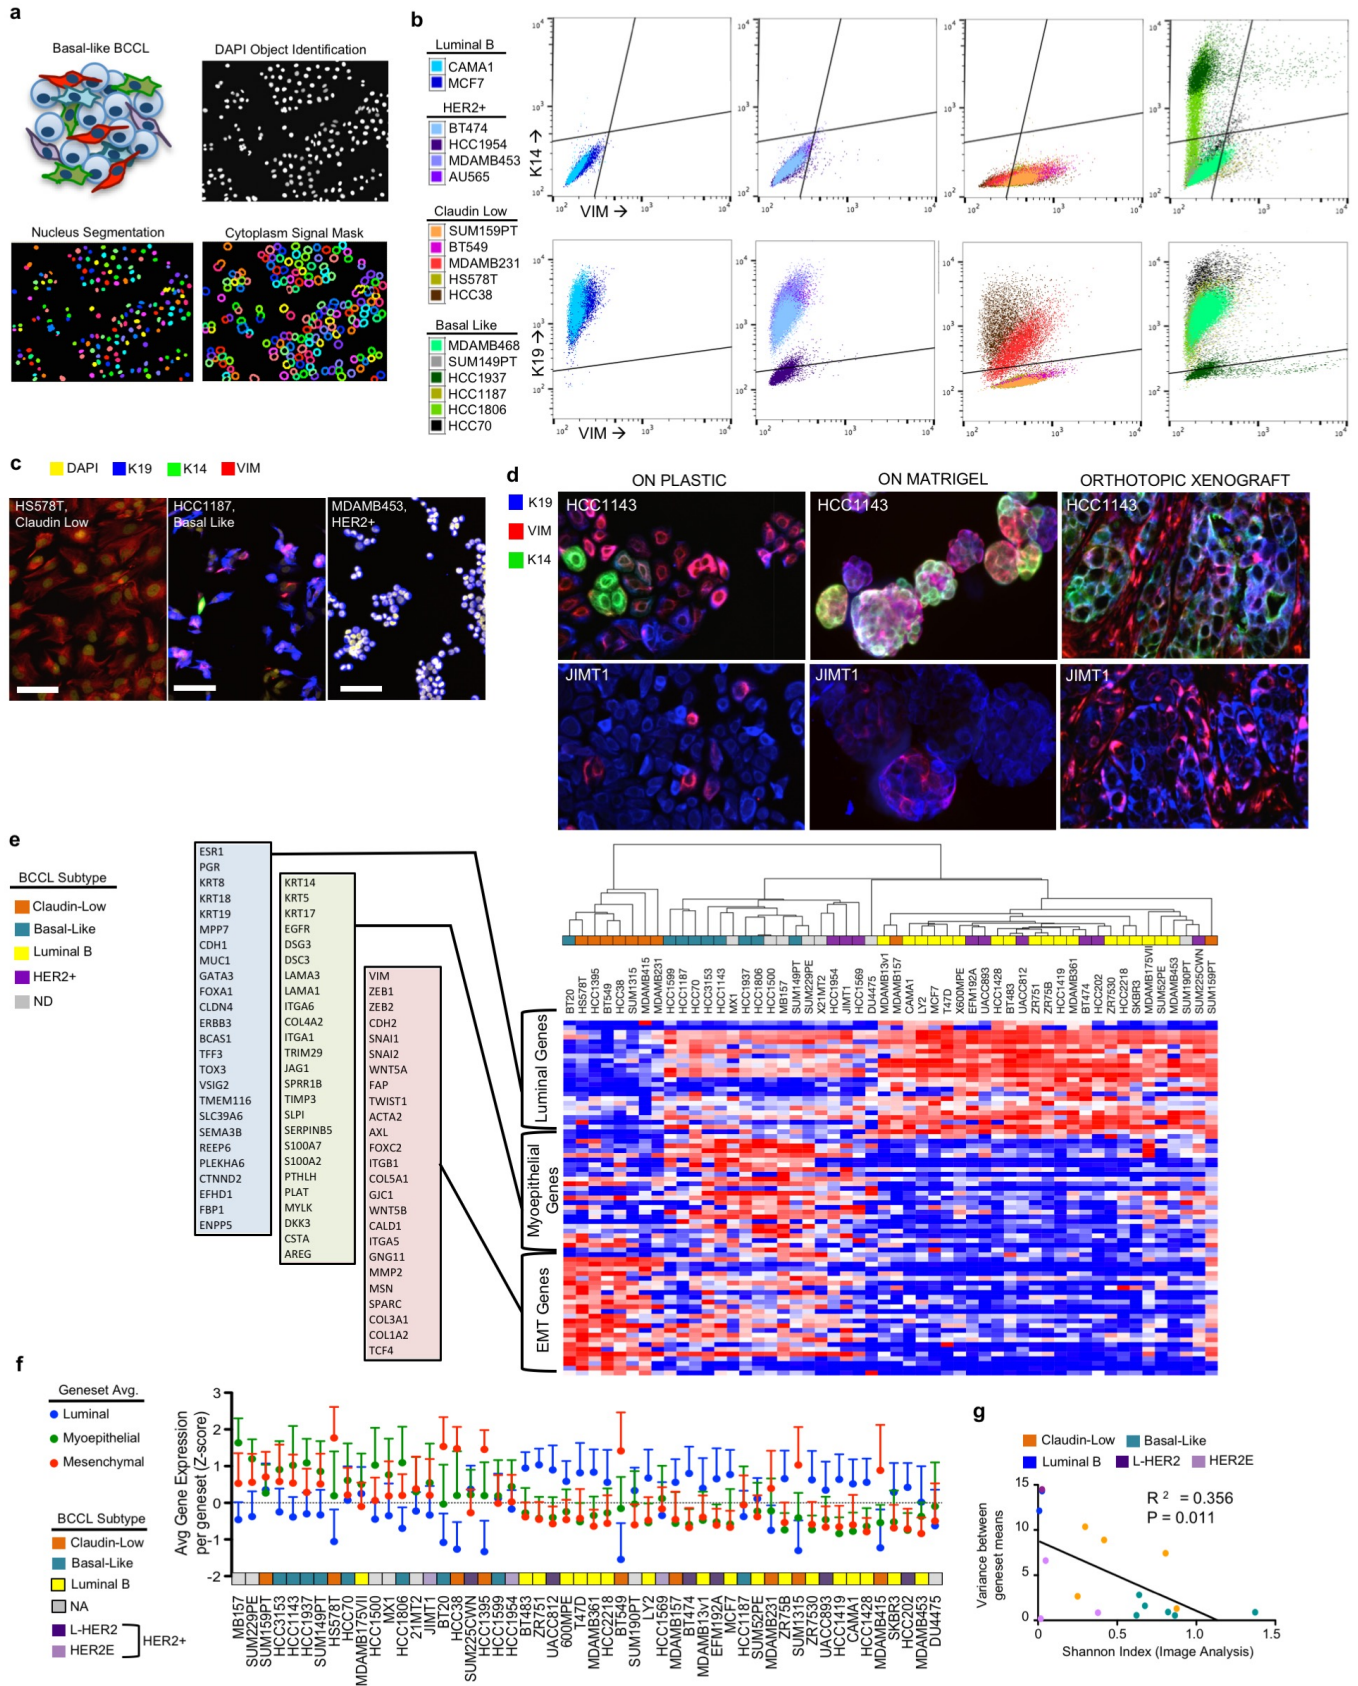

**Supplementary Figure 2. Interrogating differentiation state heterogeneity in breast cancer cell lines.**

(a) Schematic showing the Cell Profiler workflow to measure single cell intensity of cell-state marker expression in 4-color-IF images of breast cancer cell lines. DAPI signal is used to segment single nuclei, and an expanded annulus from each nucleus (not including nuclear signal) is used to measure signal intensity from the 488, 568, and 647 channels in the cell cytoplasm. (b) Image cytometry plots showing K14 vs VIM expression, and K19 vs VIM expression, for multiple luminal B, claudin-low, HER2E, and basal-like cell lines. K19+, K14+ and VIM+ gates displayed. (c) Images of three cell lines (in addition to Fig. 1h) of different molecular subtypes showing DAPI (yellow), K14 (green) and VIM (red). Scale bars = 100 $\mu$ m. (d) Images of HCC1143 (basal-like) and JIMT1 (HER2E) cells grown in 2D on plastic, grown on top of matrigel, and grown as orthotopic xenografts, showing K19 (blue), K14 (green) and VIM (red). (e) Heatmap of gene expression showing 45 breast cancer cell lines and their expression of 25 luminal, 25 myoepithelial, and 25 mesenchymal-transition correlated genes as shown in Figure 2a with the addition of cell line and gene names, cell lines arranged by unsupervised Pearson-coefficient clustering. Cell line molecular subtype is denoted by color: claudin-low (orange), basal-like (cyan), luminal B (yellow), HER2E (purple), not determined (ND, white). (f) Graph of the mean normalized gene expression value (Z-score) of the luminal (L, blue), basal (B, green), and mesenchymal (M, red) genesets are displayed in each cell line with standard deviation of expression. Cell lines are arranged in descending order according to the mean Z-score of all genesets. Cell line subtype is denoted by color as in e. (g) Scatterplot comparing the geneset variance metric from transcriptional data (Y axis) to the Shannon diversity indices from imaging data (X axis) with accompanying linear regression analysis. Regression fit ( $R^2$ ) and significance of non-zero slope (P-value) are displayed.

### Supplementary Figure 3 | Targeted therapy drug screen in SUM149PT

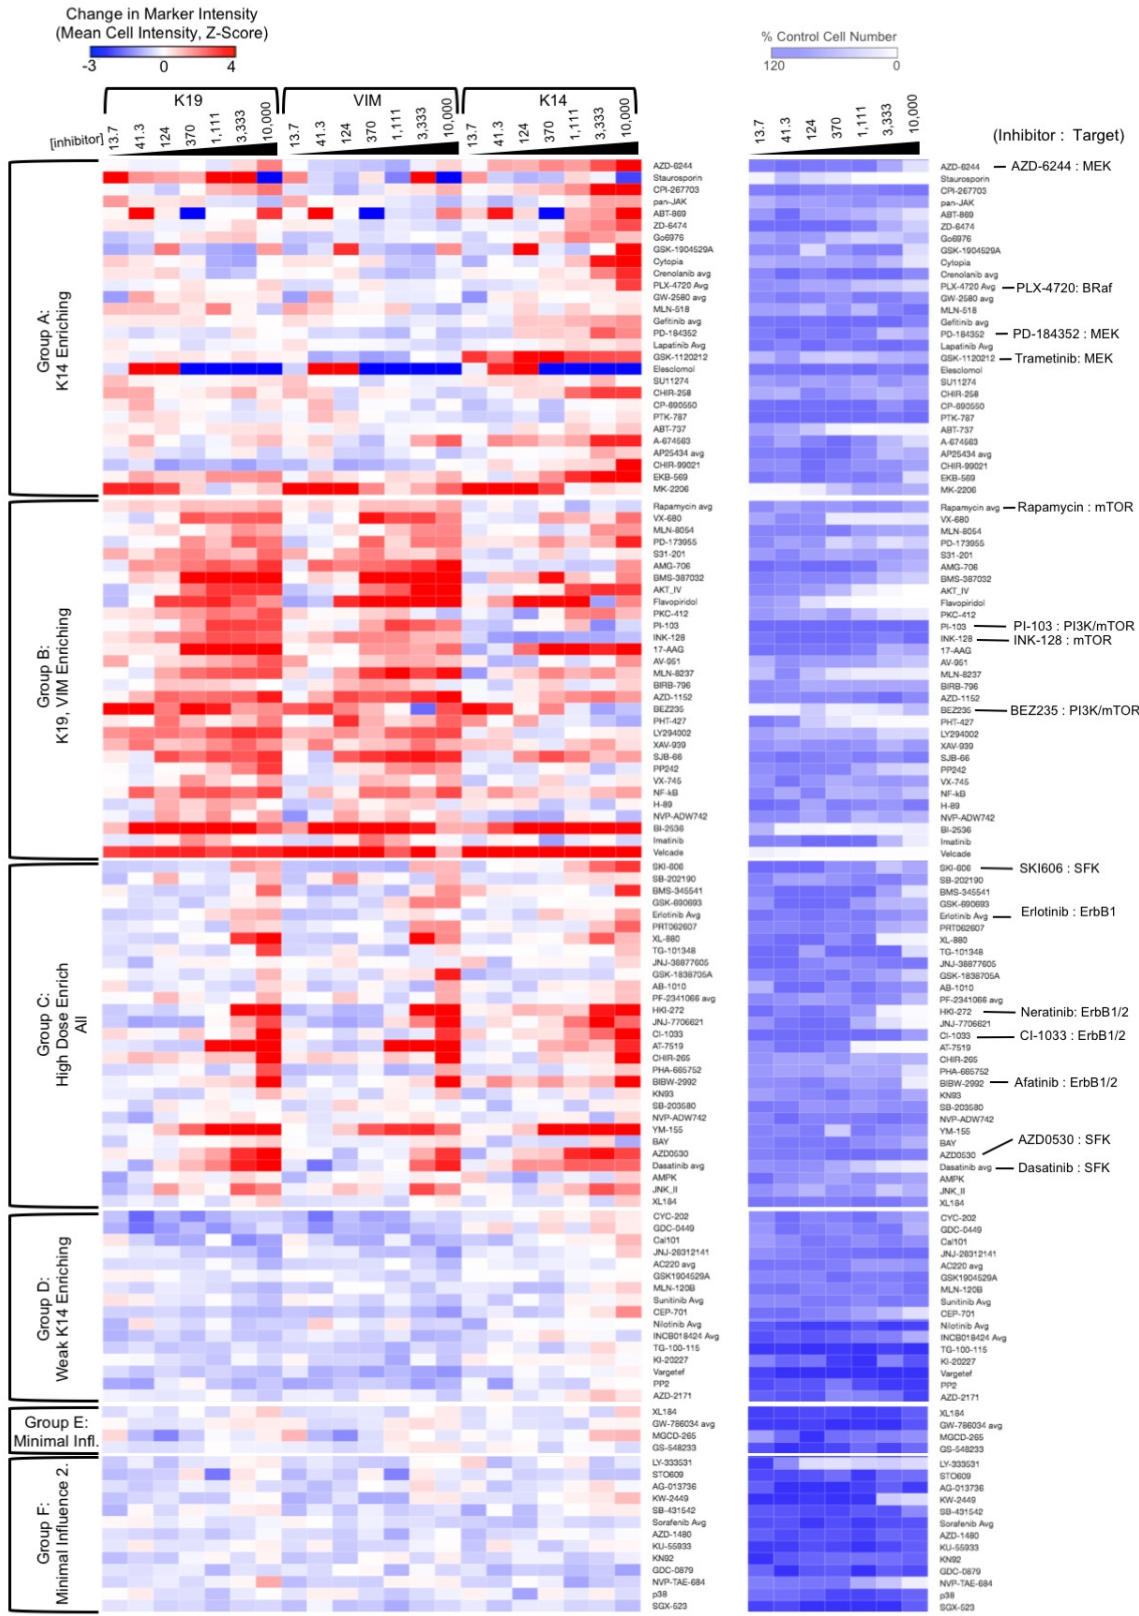

**Supplementary Figure 3. Targeted therapy drug screen in SUM149PT.**

Heatmap showing the results of a 72hr drug screen with 7-doses of 119 targeted therapeutics in SUM149PT cells, examining % control viability (right) and the change in K19, K14 and VIM expression compared to DMSO control wells (Z-score). Drugs are arranged and grouped by K=6 K-means clustering with all drugs labeled. Select drugs that are highlighted in **Figure 2a** have enlarged bold labels.

**Supplementary Figure 4 | MEK and PI3K/mTOR inhibitors have an opposing influence on the frequency of basal-differentiated cells in drug-persisting populations.**

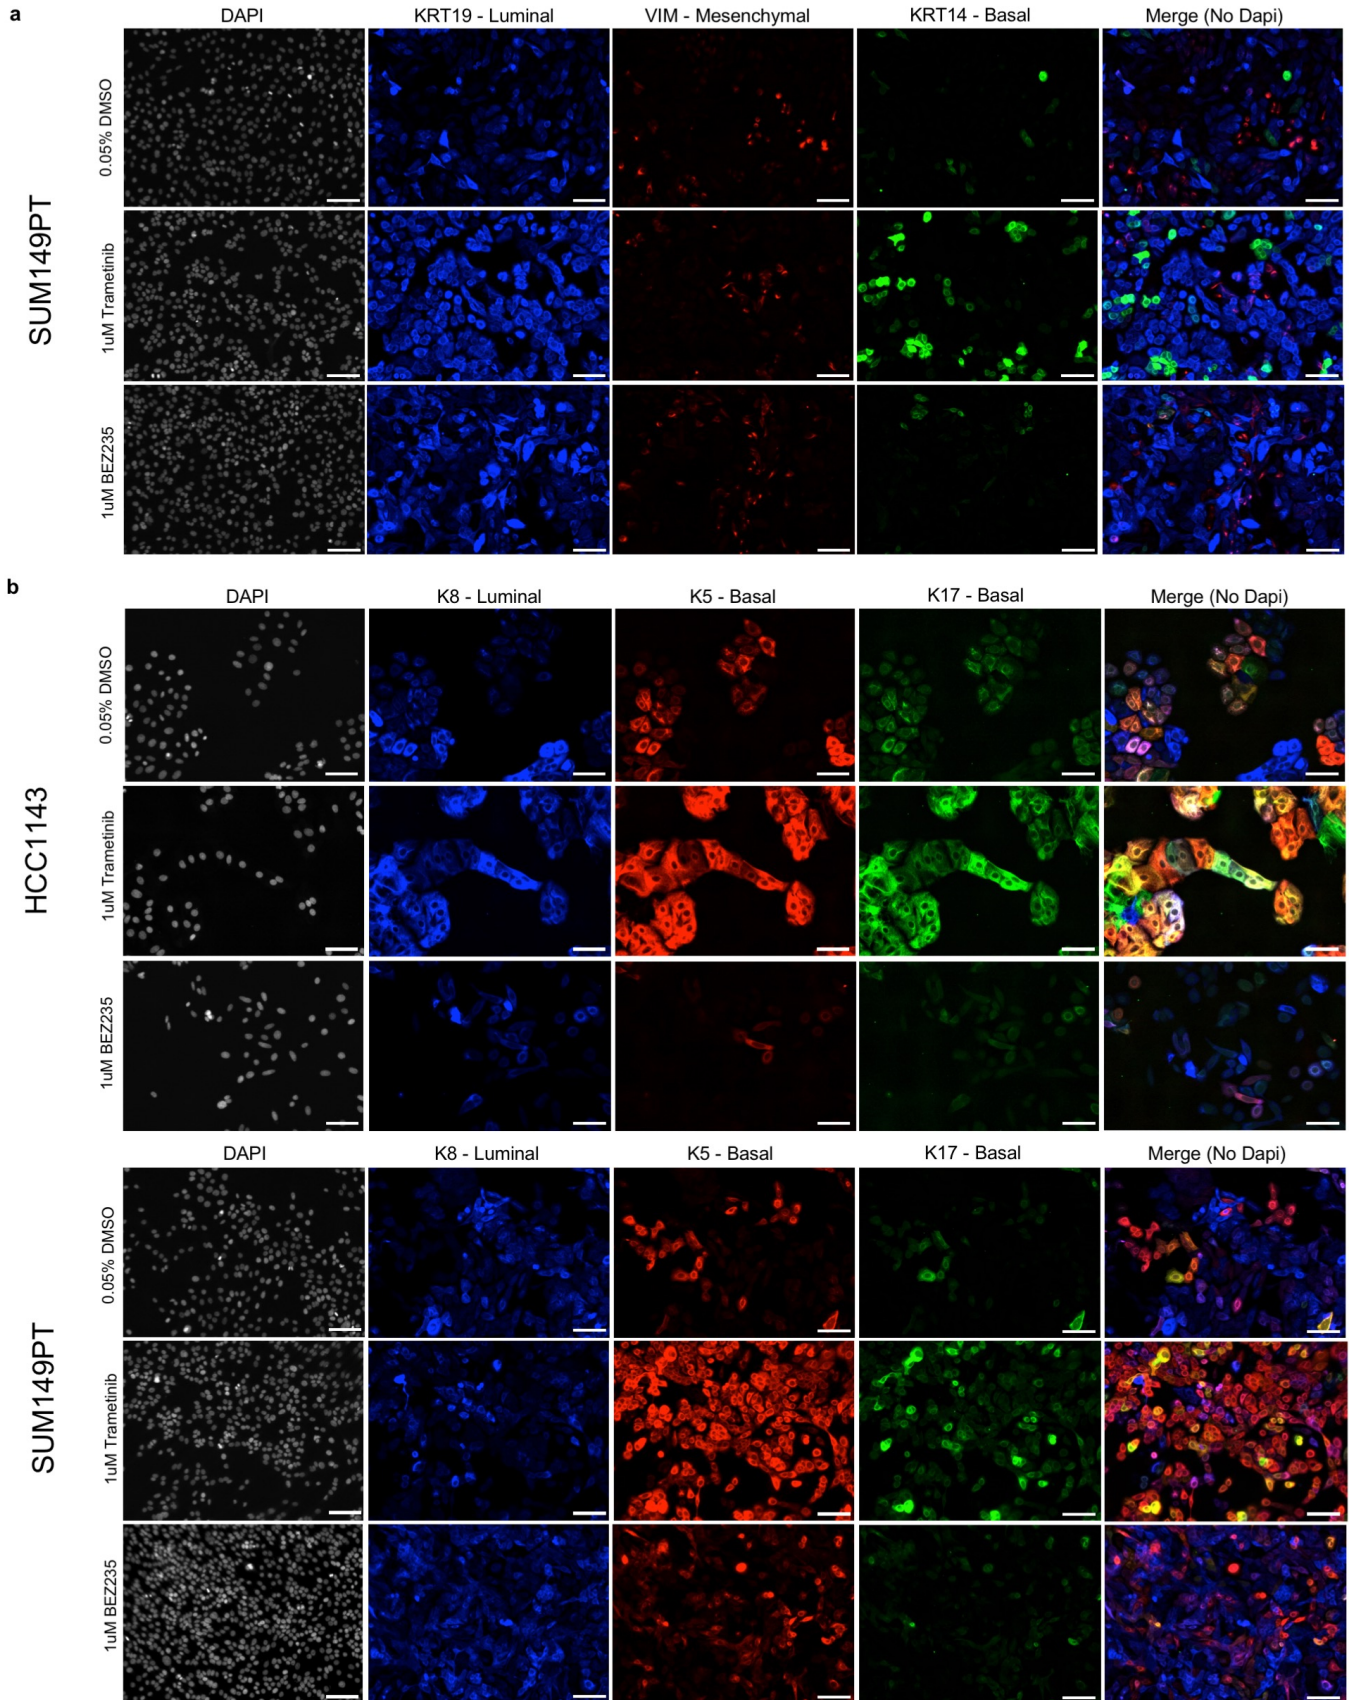



**Supplementary Figure 4. MEK and PI3K/mTOR inhibitors have an opposing influence on the frequency of basal-differentiated cells in drug-persisting populations.**

(a) Images of SUM149PT under DMSO control conditions or following 72hr of 1 $\mu$ M Trametinib or 1 $\mu$ M BEZ235, showing DAPI, K19, VIM, K14 and a 4-color merged image, scale bars = 100 $\mu$ m (b) Images of HCC1143 and SUM149PT under DMSO control conditions or following 72hr of 1 $\mu$ M Trametinib or 1 $\mu$ M BEZ235, showing DAPI, K8, K5, K17 and a 4-color merged image, scale bars = 100 $\mu$ m.

Supplementary Figure 5 | MEK and PI3K/mTOR enrich distinct DTP differentiation-states in basal-like cell lines.

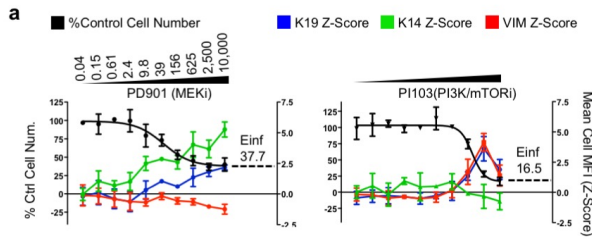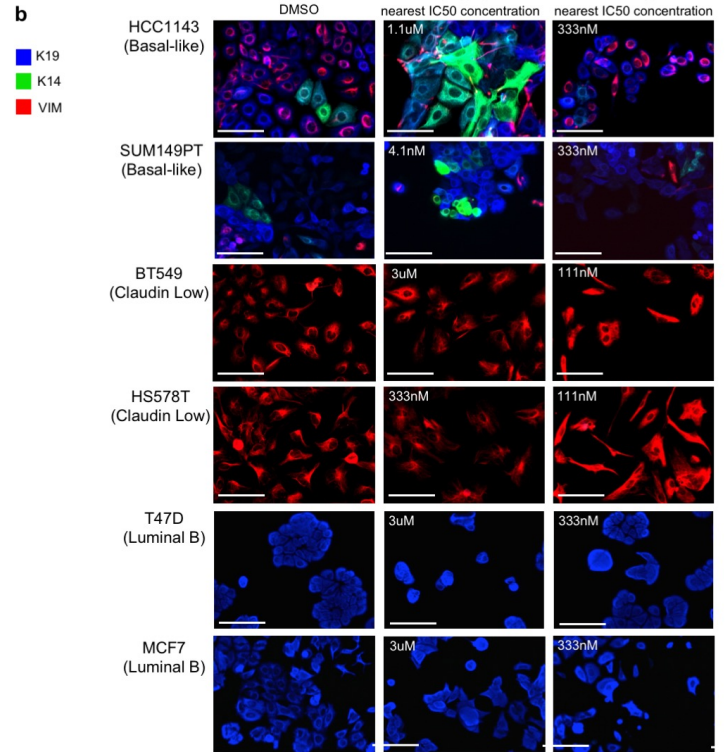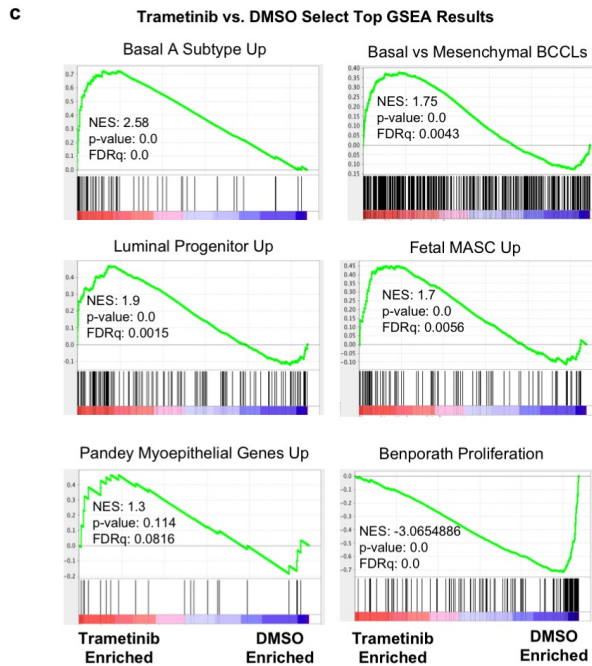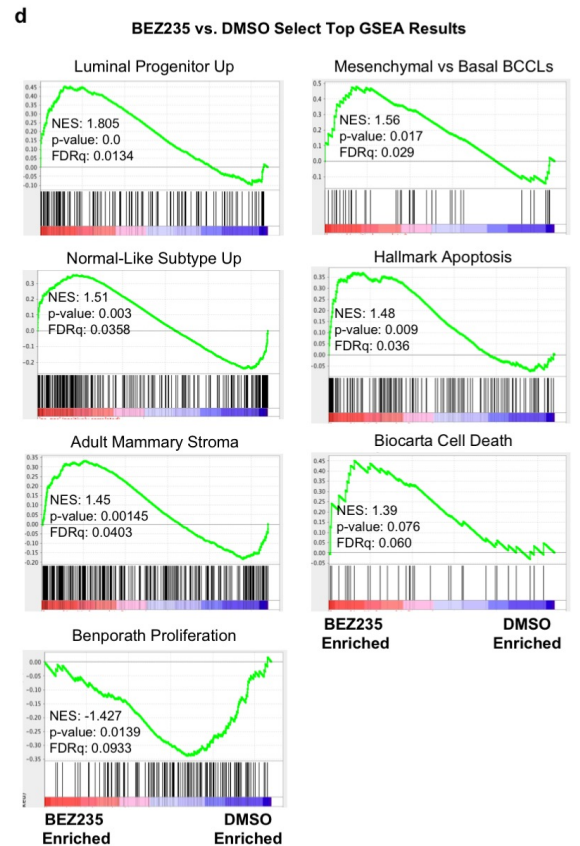

**Supplementary Figure 5. MEK and PI3K/mTOR inhibitors enrich distinct DTP differentiation-states in basal-like cell lines.**

(a) Graphs of therapy-induced changes in cell number (left axis) and mean-cell MFI (right axis, as Z-score) of K19 (blue), VIM (red), and K14 (green), in HCC1143 cells following 72hr incubation with increasing doses of the MEK inhibitor PD901, or PI3K/mTOR inhibitor PI103. The projected maximum level of inhibition, or Einf, is shown for each drug. (b) Images of two basal-like cell lines (HCC1143 and SUM149PT), two Claudin-low lines (BT549 and HS578T), or two Luminal B cell lines (T47D and MCF7) following 72h treatment with the nearest-to-IC50 dose of Trametinib, BEZ235, or DMSO, dose displayed on image. K19 (blue), VIM (red), and K14 (green) shown, scale bars = 100 $\mu$ m. (c) Select top-enriched genesets are shown for 6day Trametinib treated HCC1143 cells vs. DMSO with Normalized Enrichment Score (NES), Nominal P-value (p-value), and FDR q-value (FDRq) shown. (d) Select top-enriched genesets are shown for 6day BEZ235 treated HCC1143 cells vs. DMSO.

**Supplementary Figure 6 | Further characterization of Trametinib and BEZ235 DTP phenotypes.**

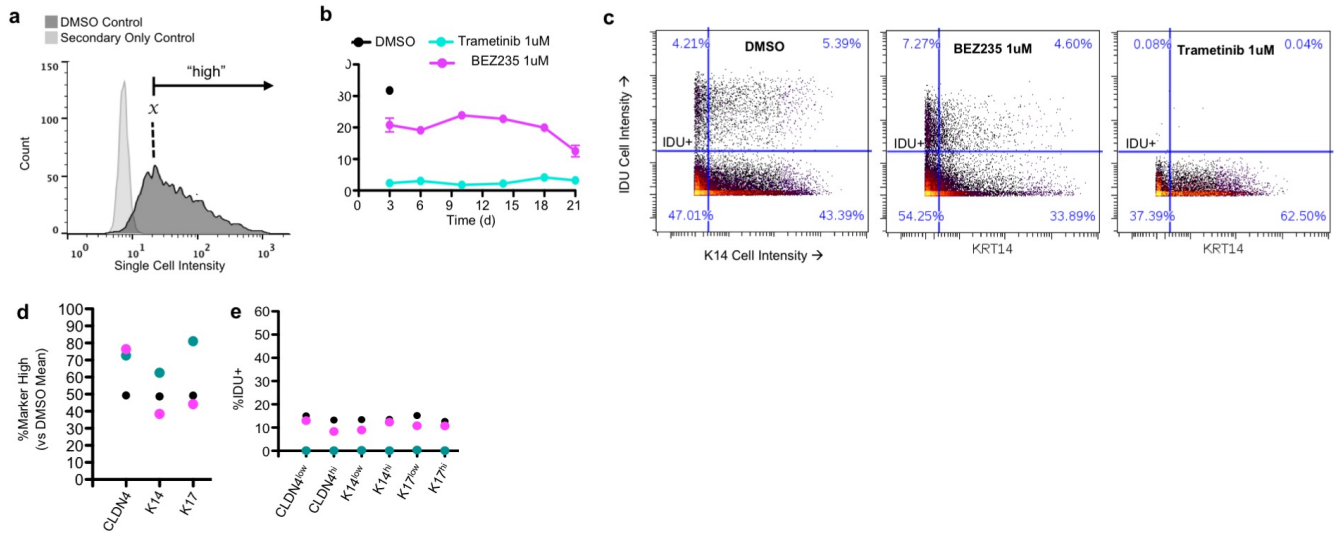

**Supplementary Figure 6. Further characterization of Trametinib and BEZ235 DTP phenotypes.**

(a) Schematic showing how high expression of a phenotype marker is determined from DMSO population values. (b) Graph showing EdU incorporation rates in HCC1143 cells every 3-4 days while being maintained on 1 $\mu$ M Trametinib or 1 $\mu$ M BEZ235 for 21 days, with the incorporation rate of DMSO shown for the first 3 days of growth. (c) Dot plots showing mass cytometry results comparing single cell IdU and K14 levels following 72hr of 1 $\mu$ M Trametinib, 1 $\mu$ M BEZ235, or a DMSO control. (d) Graph showing the percent of cells expressing high levels of the luminal marker CLDN4, basal markers K14 and K17, or mesenchymal marker VIM following 72hr of 1 $\mu$ M Trametinib or BEZ235, measured by mass cytometry. (e) Graph showing the frequency of IdU+ cells in cells also expressing high and low values of CLDN4, K14, K17, and VIM from d.

Supplementary Figure 7 | Assessing genotypic selection following Trametinib and BEZ235.

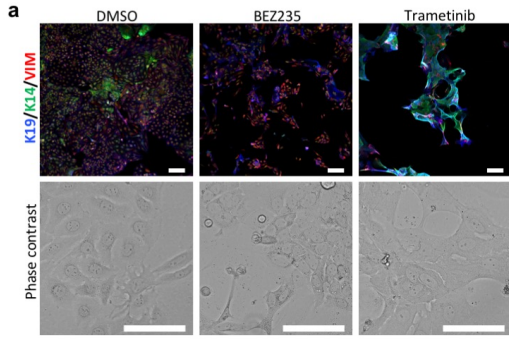

**b**

| Replicate Library           | Treatment  | Mean Coverage | % On-Target | % Duplication |
|-----------------------------|------------|---------------|-------------|---------------|
| dms0_rep1.pe.sort.bam       | DMSO       | 113           | 0.56        | 0.11          |
| bez235_rep1.pe.sort.bam     | BEZ235     | 115           | 0.59        | 0.12          |
| trametinib_rep1.pe.sort.bam | Trametinib | 100           | 0.57        | 0.11          |
| dms0_rep2.pe.sort.bam       | DMSO       | 131           | 0.53        | 0.12          |
| bez235_rep2.pe.sort.bam     | BEZ235     | 96            | 0.58        | 0.10          |
| trametinib_rep2.pe.sort.bam | Trametinib | 103           | 0.58        | 0.11          |
| dms0_rep3.pe.sort.bam       | DMSO       | 112           | 0.61        | 0.11          |
| bez235_rep3.pe.sort.bam     | BEZ235     | 93            | 0.52        | 0.08          |
| trametinib_rep3.pe.sort.bam | Trametinib | 99            | 0.56        | 0.10          |

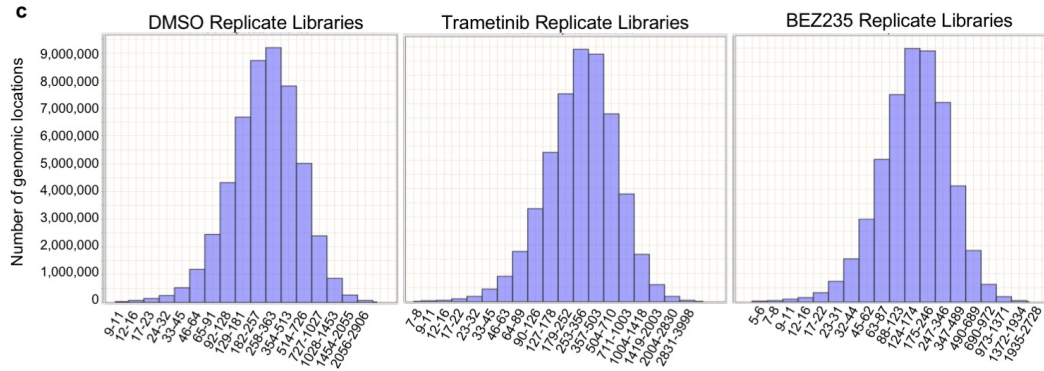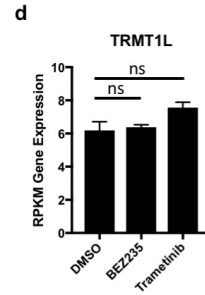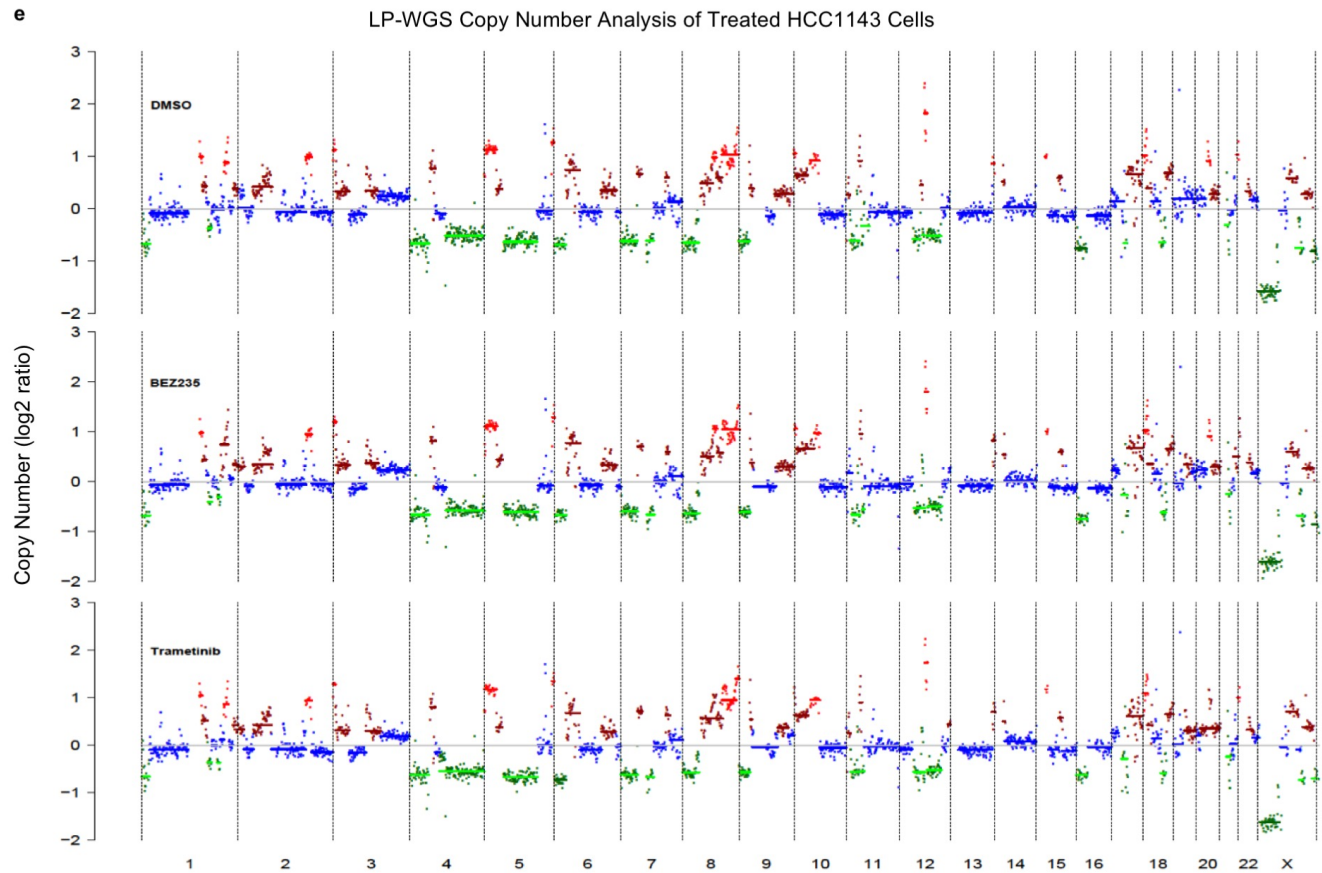

**Supplementary Figure 7. Assessing genomic selection following Trametinib or BEZ235.**

(a) The phenotypic change in HCC1143 cells that were harvested for whole exome sequencing and whole genome sequencing analysis is shown by three color IF with K19 (blue), K14 (green) and VIM (red) as well as with phase contrast, scale bars = 100 $\mu$ m. (b) A table showing mean sequencing statistics for each experimental replicate from WES analysis. (c) Histograms showing the distribution of sequencing coverage by genomic location for the different experimental conditions (pooled replicates). (d) Gene expression of TRMT1L is compared between treatment groups. (e) Copy number alteration plots of HCC1143 cells under the various treatment conditions, where blue represents copy neutral, green represents deletion, maroon represents gain, and red represents amplification.

## Supplementary Figure 8 | Computational modeling of the BEZ235 response and drug washout analysis.

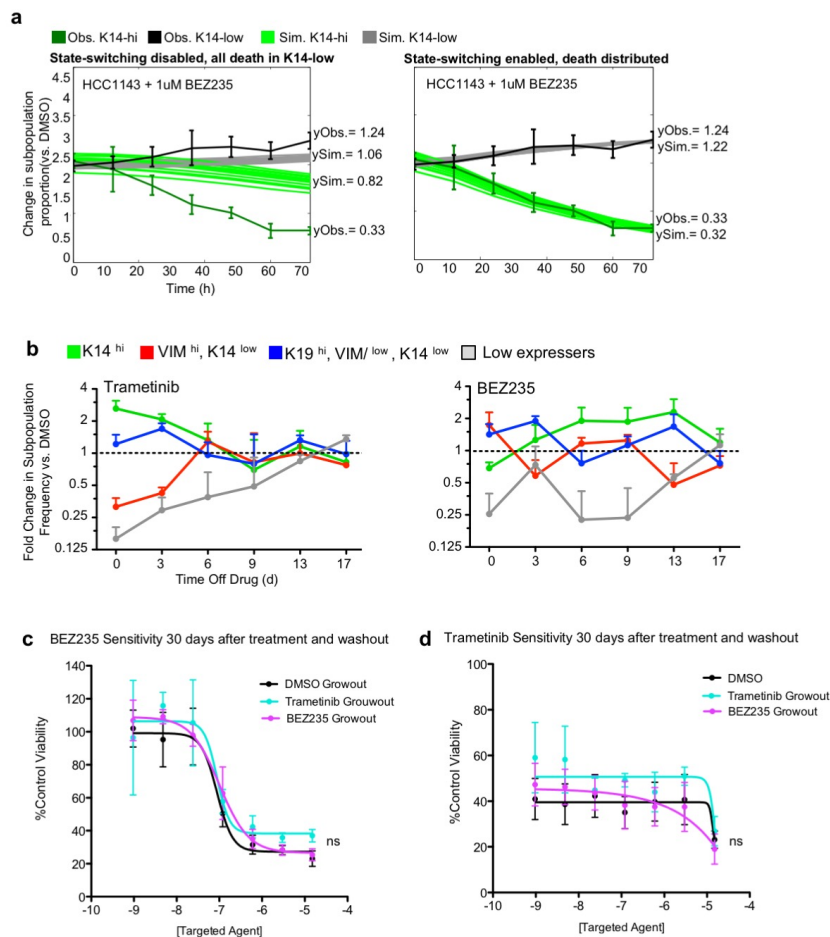

**Supplementary Figure 8. Computational modeling of the BEZ235 response and drug washout analysis.** (a) Simulated fold change of 1 $\mu$ M BEZ235-treated HCC1143 cells vs. DMSO using the model presented in Fig. 3g with two separate hypotheses:  $K14^{low}$  Darwinian selection (left) where all cell death occurs in K14<sup>hi</sup> cells and cells cannot transition between states, *cell-state transition* (right) where cell death is distributed evenly between states and cells can transition between states. Observed and simulated values at 72hr are shown to the right of both plots. (b) Graph showing the cell state composition of 4 differentiation states vs. DMSO, as in Figure 3a, following 72hr of 1 $\mu$ M Trametinib or 1 $\mu$ M BEZ235 treatment then drug washout, examining cell state composition every 3-4 days for 17 days, n=4 with SD. (c) Dose response curves showing sensitivity to BEZ235 in untreated cells, or cells treated with Trametinib or BEZ235 then recovered from drug washout for 30 days. ns = not significant, full dose response compared using two-way ANOVA, examining ‘interaction’. (d) Same as in c examining sensitivity to Trametinib in untreated or inhibitor-recovered cells.

# Supplementary Figure 9 | Targeting DTP states using VIPER informed pathway analysis

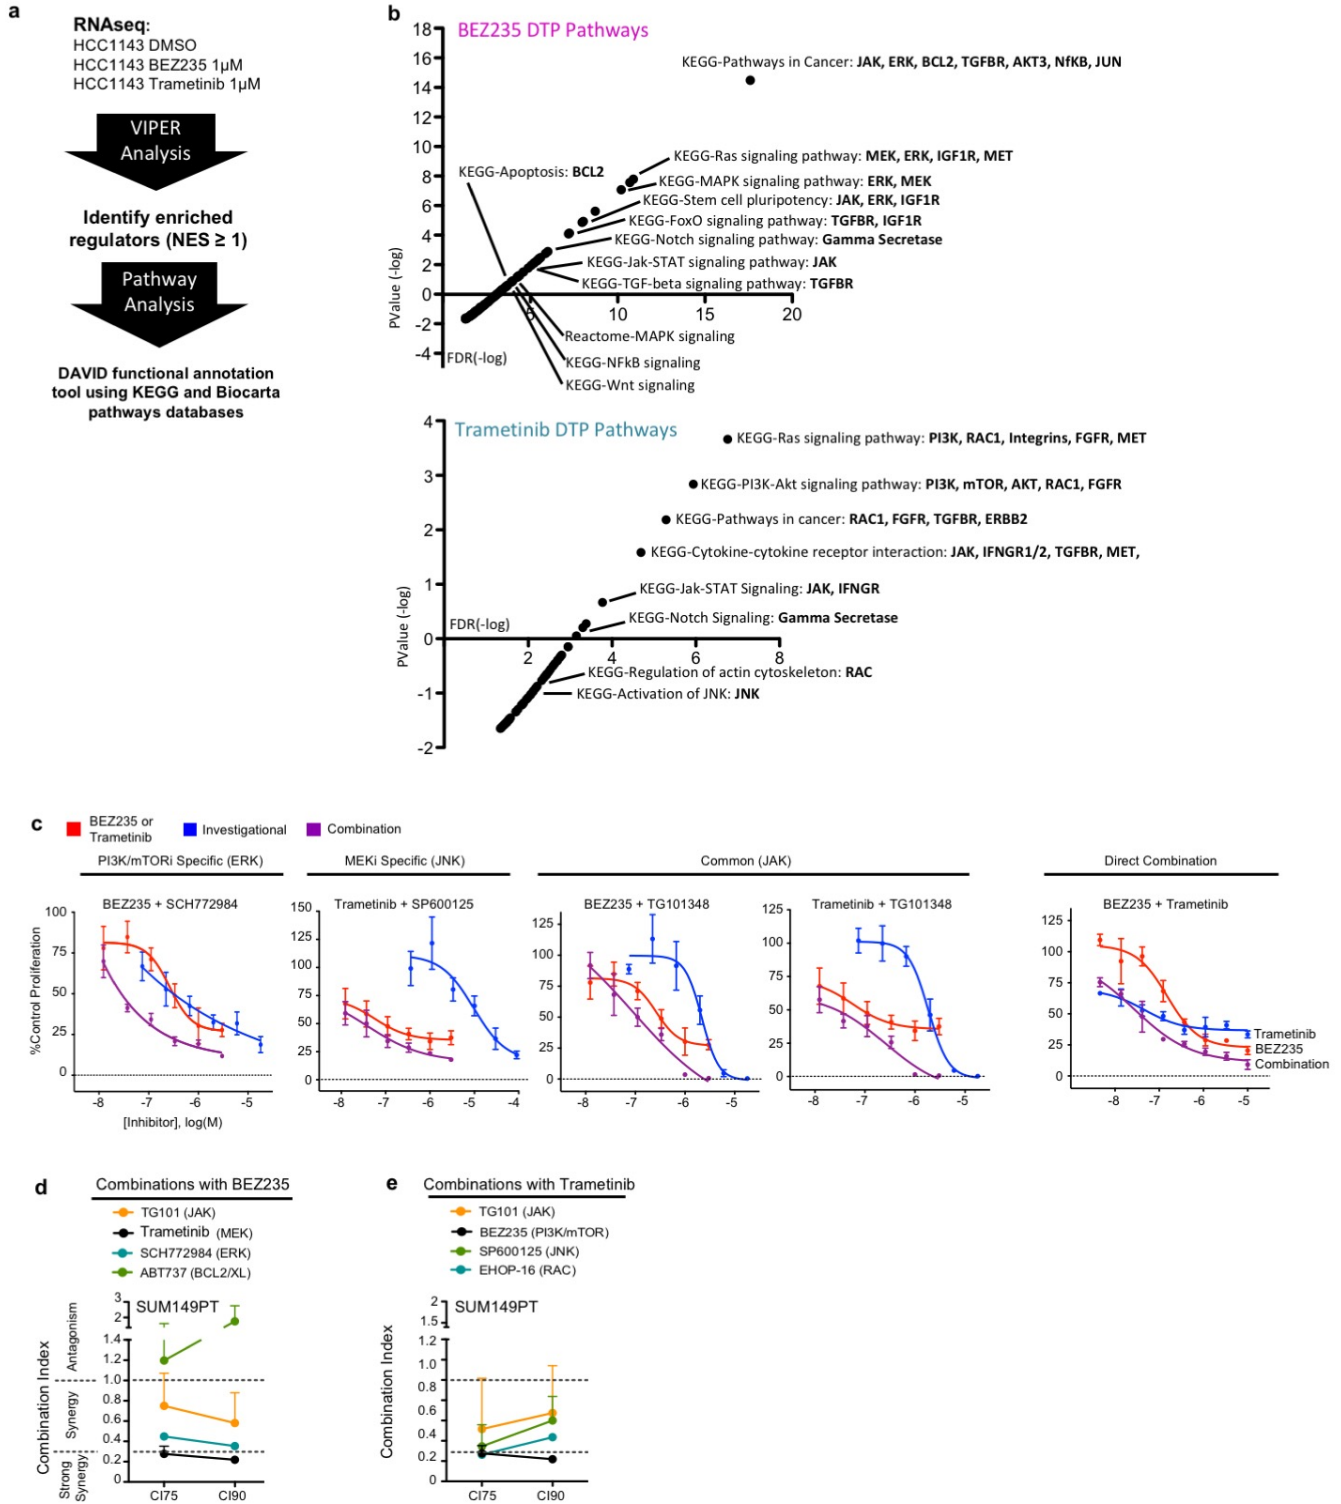



**Supplementary Figure 9. Targeting DTP states using VIPER informed pathway analysis.**

(a) Schematic showing how RNAseq information is analyzed to identify targetable pathway regulators using VIPER and DAVID pathway ontology using the KEGG and Biocarta databases. (b) Plots show enriched pathways identified by the DAVID pathway annotation tool, using upregulated VIPER regulators in BEZ235 and Trametinib DTPs as input. P-value (-log) is plotted against FDR values (-log). Select pathways are labeled, and druggable targets within those pathways are listed in bold. (c) Dose-response curves examining the viability of HCC1143 cells following combination treatments with BEZ235, Trametinib, and the investigational agents targeting resistant cell-state pathways used in Fig. 4b, n=3 with SD. (d) Graph showing combination indices for the agents identified in *d* when combined with BEZ235 in SUM149PT cells. (e) Graph showing combination indices for the agents identified in *d* when combined with Trametinib in SUM149PT cells.

**Supplementary Figure 10 | Combination therapy leaves distinct drug-persisting cells that are broadly drug-tolerant and can proliferate and recapitulate heterogeneity upon drug removal.**

**a**

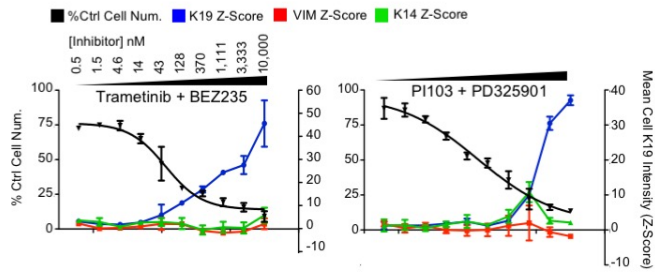

**b**

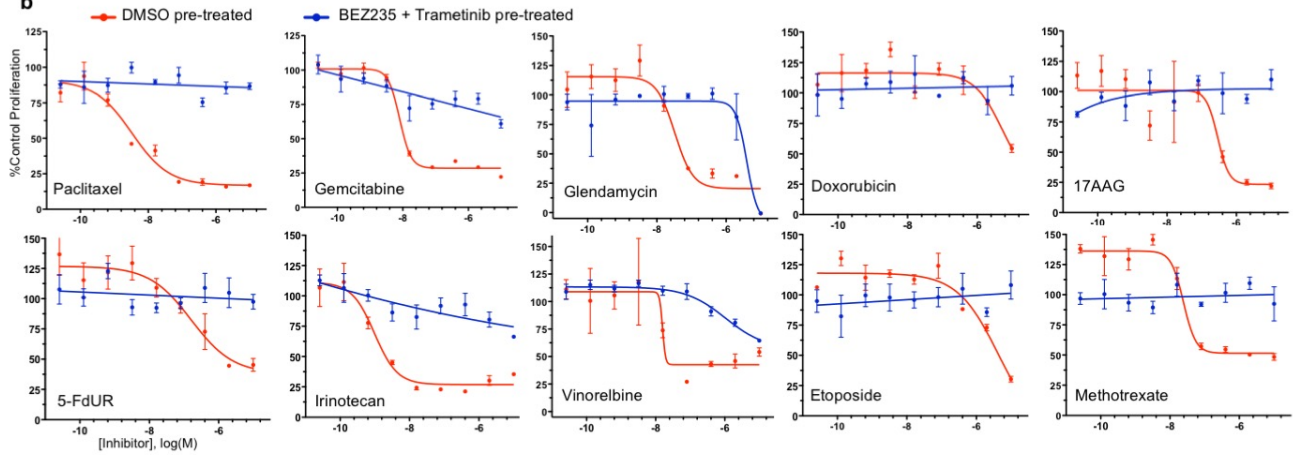

**c**

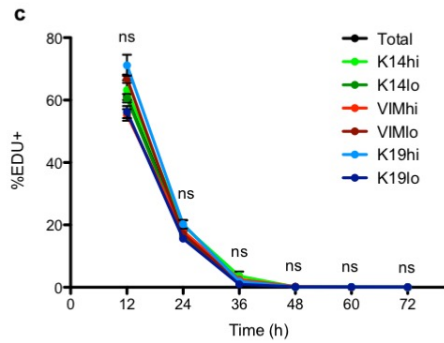

**d**

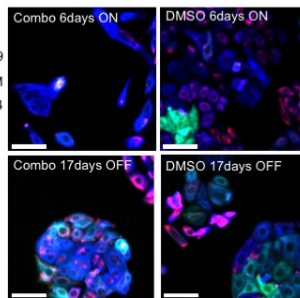

**e**

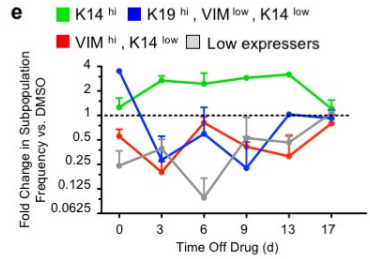

**f**

Combo Sensitivity 30 days after treatment and washout

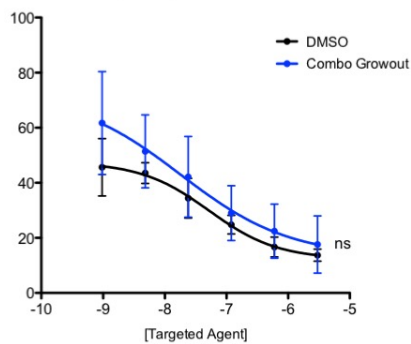

**Supplementary Figure 10. Combination therapy leaves distinct drug-persisting cells that are broadly drug-tolerant and can proliferate and recapitulate heterogeneity upon drug removal.**

(a) Graphs showing Trametinib + BEZ235 treatment-induced changes in cell number (black line, left axis) and population mean-cell intensities (Z-scores, right axis) of K19 (blue), VIM (red), and K14 (green) in HCC1143 following 72hr incubation with increasing doses of two different PI3K/mTORi + MEKi combinations, n=3 with SD. (b) Graphs showing the sensitivity of HCC1143 cells to numerous cytotoxic agents following 72h pre-treatment of DMSO, or 72h pre-treatment with 1 $\mu$ M BEZ235 + 1 $\mu$ M Trametinib, followed by 72h incubation with the cytotoxic agent. (c) Graph showing the frequency of EdU positive cells that also express high or low levels of K14, K19, or VIM in HCC1143 cells following 72hr treatment with 1 $\mu$ M Trametinib + 1 $\mu$ M BEZ235. ns = not significant, n=2, SD on technical replicates shown. (d) Immunofluorescent images of HCC1143 cells treated with 1 $\mu$ M Trametinib + 1 $\mu$ M BEZ235, or DMSO, for 6 days, and then following 17 days of culture after drug washout. (e) Graph showing cell state composition of 4 differentiation states as fold change vs. DMSO, as in *Figure 3a, b*, following 72hr of 1 $\mu$ M Trametinib + BEZ235 treatment then drug washout, examining cell state composition every 3-4 days for 17 days, n=4 with SD. (f) Dose response curves showing sensitivity to BEZ235 + Trametinib combination treatment in untreated cells, or cells treated with combination for 72hr then recovered from drug washout for 30 days. ns = not significant, full dose response compared using two-way ANOVA, examining 'interaction'.

**Supplementary Figure 11 | JQ1 is not synergistic with BEZ235 in Luminal B lines but shows synergy with Trametinib and Trametinib + BEZ235 combinations in Basal-like lines.**

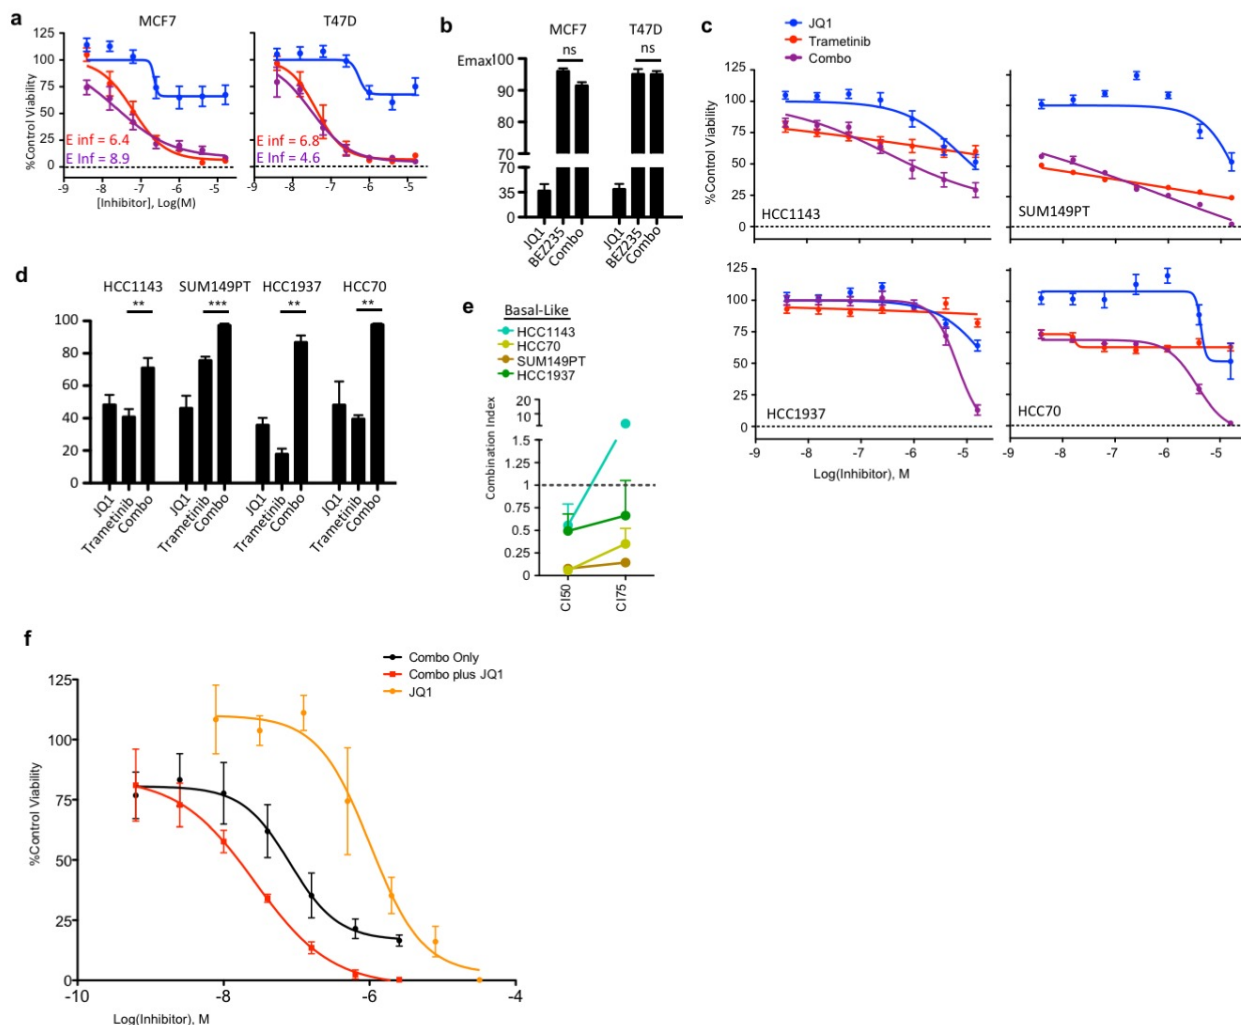

**Supplementary Figure 11. JQ1 is not synergistic with BEZ235 in Luminal B lines but shows synergy with Trametinib and Trametinib + BEZ235 combinations in Basal-like lines.**

(a) Dose-response curves show the efficacy of BEZ235 alone (red), JQ1 alone (blue), or a combination of the two agents (purple, equimolar ratio) in two luminal B cell lines using a colorimetric proliferation assay. E-infinity (E<sub>inf</sub>) values of single agent BEZ235 (red) and BEZ235 + JQ1 (purple) are displayed. n=4 with SEM. (b) Maximal inhibition (E<sub>max</sub>) by the agents shown in a is displayed for MCF7 and T47D, no significant (ns) differences were seen between E<sub>max</sub> from BEZ235 and JQ1+BEZ235. (c) Dose-response curves of Trametinib, JQ1, and Trametinib + JQ1 in four basal-like cell lines. n=4 with SEM (c) Maximal inhibition (E<sub>max</sub>) by the agents shown in c is displayed for each basal like cell line, asterisks depict significant gains in E<sub>max</sub> with JQ1 + Trametinib compared to Trametinib alone. (d) Maximal inhibition (E<sub>max</sub>) by the agents shown in c is displayed for each basal like cell line, asterisks depict significant gains in E<sub>max</sub> with JQ1 + Trametinib compared to BEZ235 alone, \*P < 0.05, \*\*P < 0.01, \*\*\*P < 0.001, \*\*\*\*P < 0.001. Graph showing combination indices for the BEZ235 + JQ1 drug combination at 75% (CI75), and 90% (CI90) inhibitory doses for 4 basal-like and 2 luminal B BCCLs, n=5 with SEM. (e) Graph showing the combination indices of Trametinib + JQ1 at 75% inhibitory values (CI75) and 90% inhibitory values (CI90) for four basal-like cell lines, n=4 with SEM. (f) A representative dose response curve of BEZ235 + Trametinib, JQ1 alone, and the three drugs in combination in HCC1143 cells.

**Supplementary Figure 12 | Drug treatments enrich open chromatin architecture states observed in subpopulations of DMSO cells.**

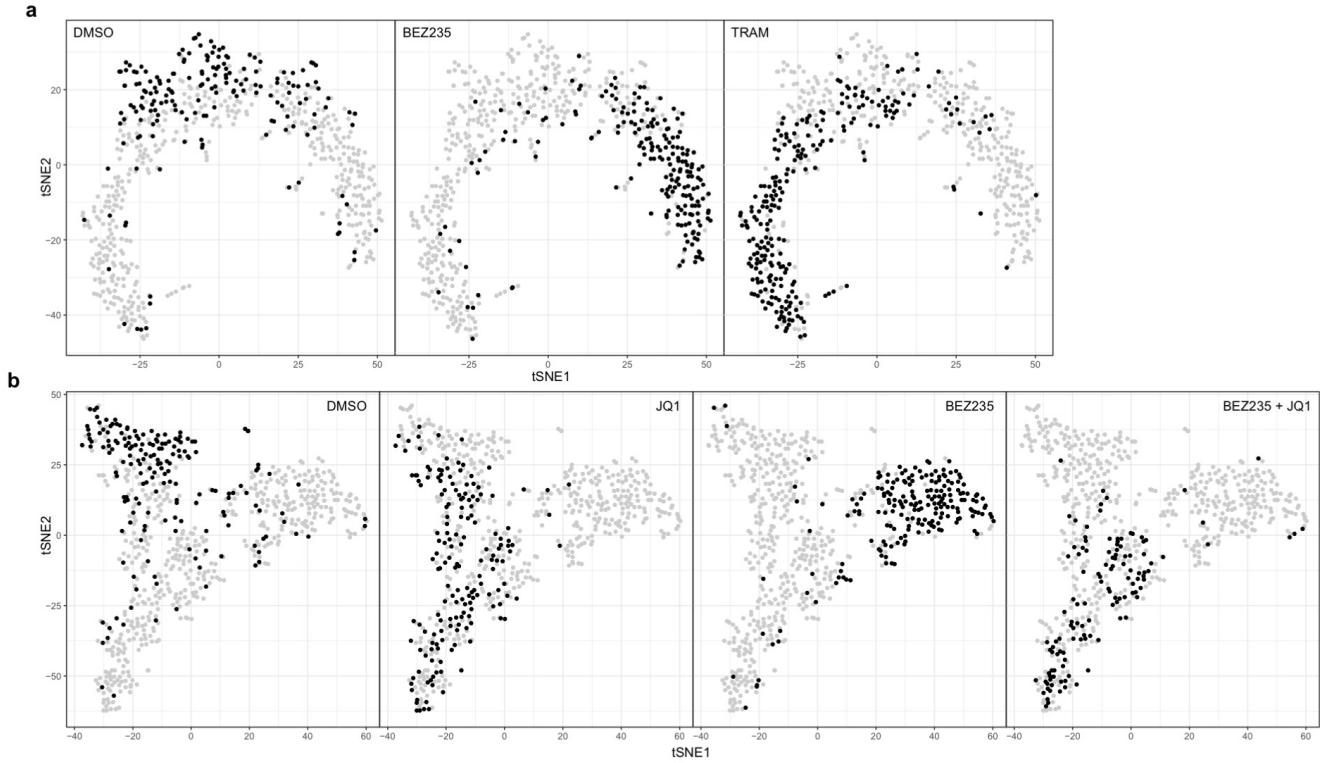

**Supplementary Figure 12. Drug treatments enrich open chromatin architecture states observed in subpopulations of DMSO cells.**

(a) t-SNE plots showing sciATACseq results, highlighting the distribution of DMSO, BEZ235, or Trametinib treated cells in black in three separate plots, all other cells are colored in grey. (b) t-SNE plots showing sciATACseq results, highlighting the distribution of DMSO, BEZ235, JQ1, or BEZ235 + JQ1 treated cells in black in four different plots, all other cells are colored in grey.

**Supplementary Figure 13 | JQ1 prevents BEZ235-driven open chromatin architecture changes and TF accessibility increases**

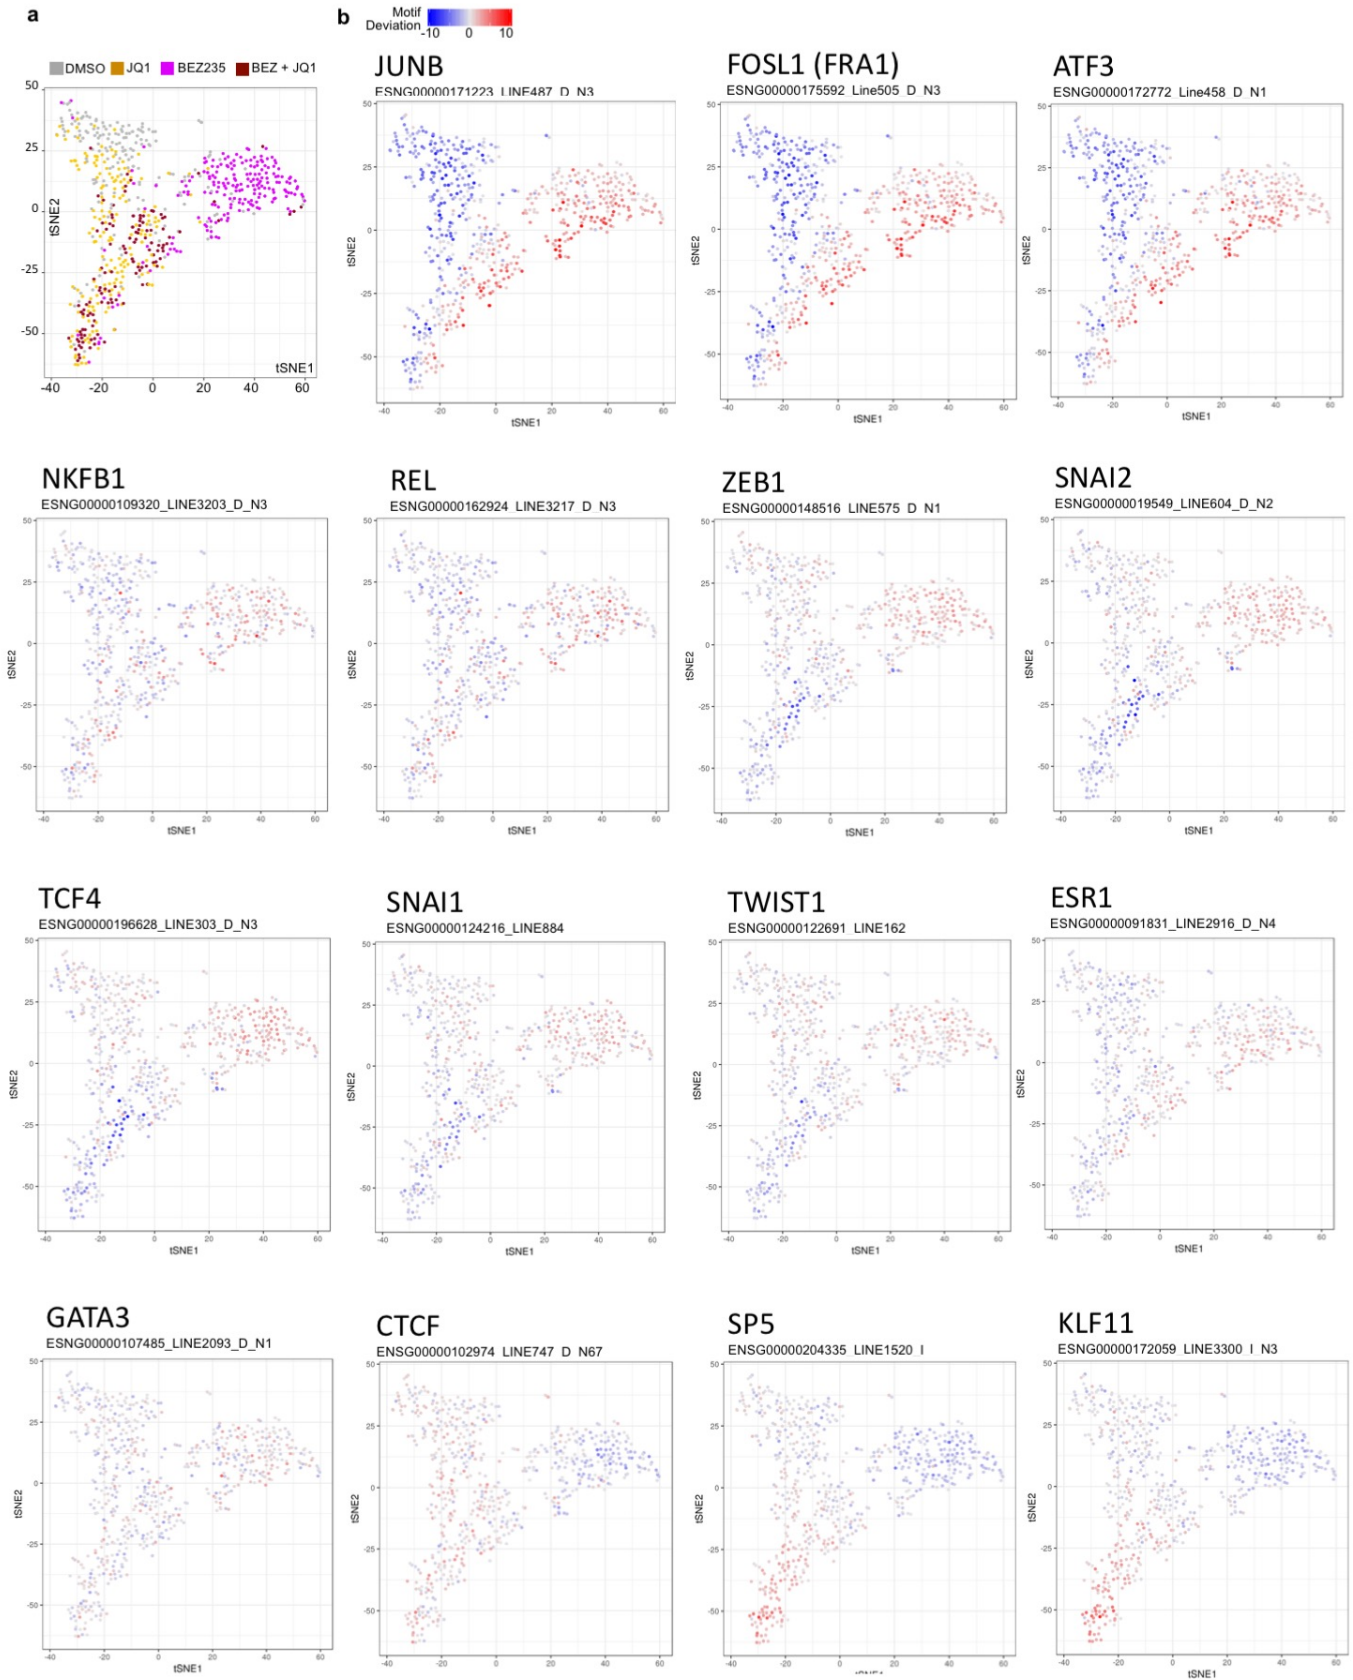

**Supplementary Figure 13. JQ1 prevents BEZ235-driven changes to open chromatin architecture and TF motif accessibility.**

(a) Figure 6c is presented again for reference for the following plots. (b) t-SNE plot showing sciATACseq results of HCC1143 cells treated with BEZ235, JQ1, BEZ235 + JQ1 or a DMSO control. Each single cell point is colored based on the level of DNA-binding motif enrichment of the listed transcription factor.

**Supplementary Figure 14 | JQ1 prevents open chromatin architecture changes that support BEZ235 DTP-state GATA3 increases.**

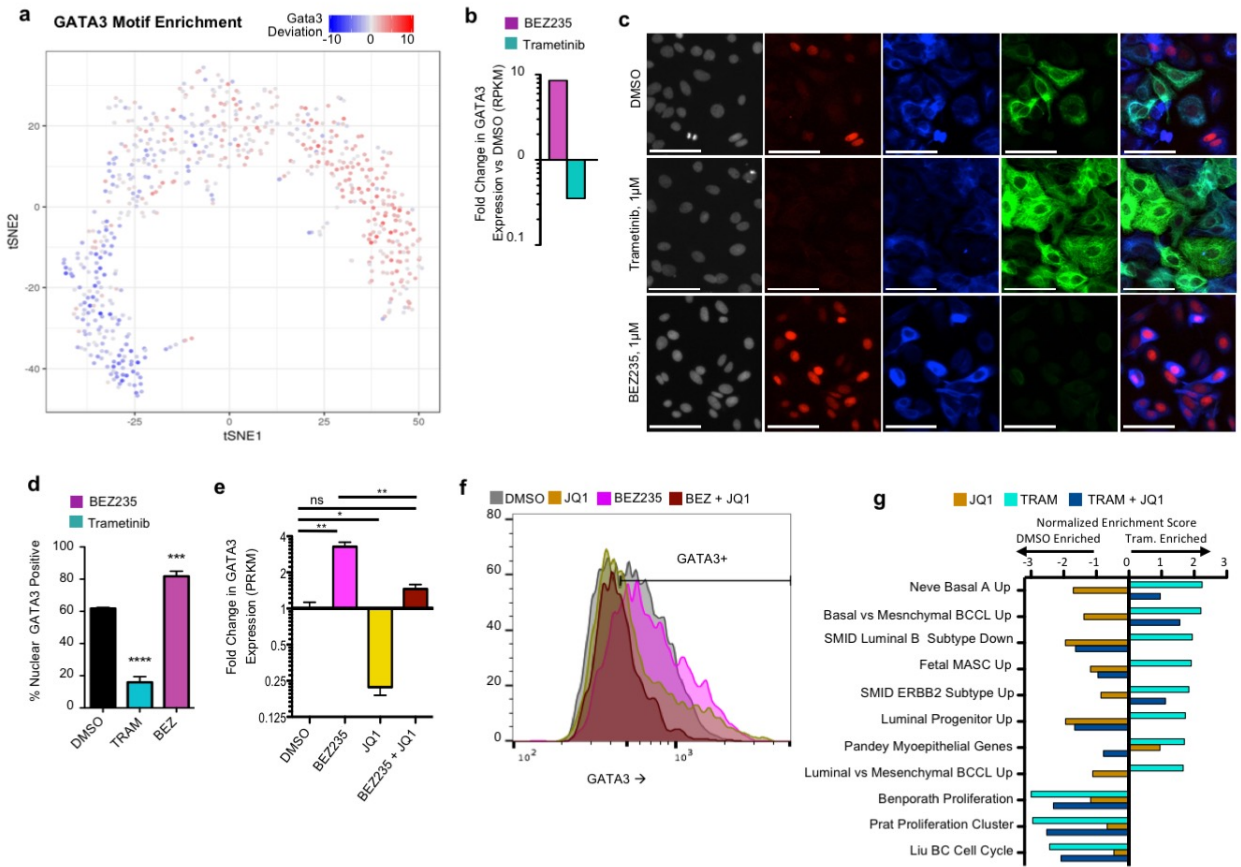

**Supplementary Figure 14. JQ1 prevents open chromatin architecture changes that support BEZ235-DTP motif accessibility.**

(a) GATA3 motif enrichment in the open chromatin regions of DMSO, Trametinib, or BEZ235 treated HCC1143 cells is shown on a t-SNE plot of single cells using sciATACseq. The treatment for each individual cell is displayed by color in Fig. 6a, red indicates increased motif enrichment, and blue indicates reduced motif enrichment. (b) Graph showing changes in GATA3 gene expression as a fold change vs. DMSO following 6d of 1μM BEZ235 or 1μM Trametinib treatment. (c) IF images showing single cell expression of GATA3 (red), K19 (blue) and K14 (green) following 72h of 1μM BEZ235, 1μM Trametinib, or a DMSO control. Scale bars = 100μm. (d) Graph showing the quantitation of the frequency of GATA3+ cells in HCC1143 following 72h of 1μM BEZ235, 1μM Trametinib, or a DMSO control. (e) A dot plot showing DNA-binding protein motif enrichment analysis between BEZ235 and BEZ235 + JQ1, both normalized to DMSO motif enrichment levels. (f) Histograms showing mean-nuclei intensities of GATA3 in HCC1143 cells following 72hr treatment with DMSO (grey), 2μM JQ1 (yellow), 1μM BEZ235 (pink), or BEZ235 + JQ1 (maroon), the gate for GATA3 positivity is shown. (g) Graph of GSEA results showing the NES of breast phenotype genesets shown to be significantly enriched (p < 0.05) following 72hr of Trametinib treatment, with the subsequent NES of that geneset in JQ1-treated, and Trametinib + JQ1-treated cells shown adjacently.



**Supplementary Figure 15 | JQ1 combines with BEZ235 *in vivo* to reduce tumor volume and suppress cell-state transitions.**

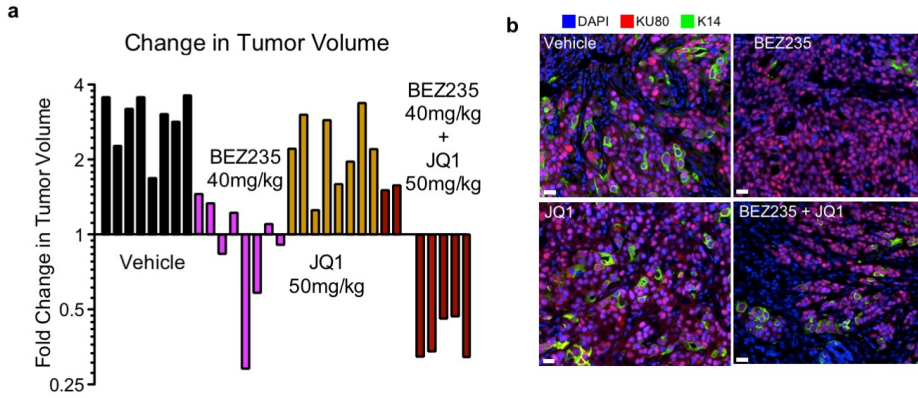

**Supplementary Figure 15. JQ1 combines with BEZ235 *in vivo* to reduce tumor volume and suppress cell-state transitions.**

**(a)** A waterfall plot shows the change in individual tumor volume, comparing treatment initiation size to size at resection (treatment day 21). Bars are colored by treatment: Vehicle (black), BEZ235 (magenta), JQ1 (yellow), BEZ235 + JQ1 (maroon). **(b)** Representative IF images of HCC70 xenograft tumors treated with vehicle, BEZ235, JQ1, or the combination of JQ1 + BEZ235 showing DAPI (blue), human specific marker Ku80 (red) and K14 (green), scale bars = 100 $\mu$ m.

**Supplementary Table 1 | Variants and indels identified in whole exome sequencing analysis comparing treated HCC1143 cells.**

VAF = Variant allele frequency, IGR = Intergenic regions, MQ = Mapping quality, RNA = variant/indel found in shared sequence of non-coding RNA

| Comparison           | Contig | Position  | Treatment Reference Count | Treatment Alt Count | Tumor VAF | Gene          | Variant Classification | Variant Type | Genomic Change (Ref>Alt Allele) | Protein Change            | Technical Concerns                                                                      |
|----------------------|--------|-----------|---------------------------|---------------------|-----------|---------------|------------------------|--------------|---------------------------------|---------------------------|-----------------------------------------------------------------------------------------|
| BEZ235 vs DMSO       | 10     | 82182414  | 23                        | 7                   | 23        | FAM213A       | Intron                 | SNV          | G>T                             | N/A                       | Error prone region, Near multiple indels, Low depth                                     |
| BEZ235 vs DMSO       | 15     | 81642092  | 30                        | 7                   | 19        | TMC3          | Intron                 | SNV          | A>T                             | N/A                       | Error prone region, Near multiple indels, T-rich/T-repetitive, Low depth                |
| BEZ235 vs DMSO       | 19     | 39422827  | 36                        | 7                   | 16        | MRPS12        | Intron                 | SNV          | G>A                             | N/A                       | Error-prone region (A-rich/A-repetitive)                                                |
| Trametinib vs DMSO   | 2      | 171094874 | 27                        | 5                   | 16        | MYO3B         | Intron                 | DEL          | TTC>T                           | N/A                       | Repetitive TC Region                                                                    |
| Trametinib vs DMSO   | 15     | 90340666  | 27                        | 3                   | 10        | ANPEP         | Intron                 | DEL          | TT>T                            | N/A                       | Repetitive T Region                                                                     |
| Trametinib vs DMSO   | 19     | 15692663  | 36                        | 4                   | 10        | Unknown       | IGR                    | SNV          | C>G                             | N/A                       |                                                                                         |
| Trametinib vs DMSO   | 22     | 38903371  | 31                        | 5                   | 14        | DDX17         | Intron                 | DEL          | AA>A                            | N/A                       | Repetitive A Region                                                                     |
| Trametinib vs DMSO   | X      | 76632551  | 27                        | 3                   | 10        | Unknown       | IGR                    | INS          | A>AA                            | N/A                       | Repetitive A Region                                                                     |
| BEZ235 vs Trametinib | 1      | 12023765  | 36                        | 4                   | 10        | PLOD1         | Intron                 | DEL          | TCCTCC>TCC                      | N/A                       | Repetitive TCC Region                                                                   |
| BEZ235 vs Trametinib | 3      | 70175377  | 63                        | 9                   | 13        | Unknown       | IGR                    | SNV          | C>T                             | N/A                       | T-variant rich region, Present in DMSO, low VAF                                         |
| BEZ235 vs Trametinib | 3      | 110866077 | 27                        | 6                   | 18        | PVRL3         | Intron                 | SNV          | C>G                             | N/A                       | Low depth in Tram, Present in DMSO                                                      |
| BEZ235 vs Trametinib | 7      | 116772155 | 39                        | 5                   | 11        | ST7           | Intron                 | INS          | T>TT                            | N/A                       | Repetitive T Region                                                                     |
| BEZ235 vs Trametinib | 10     | 18122510  | 27                        | 6                   | 18        | MRC1          | Intron                 | SNV          | G>A                             | N/A                       | Low MQ region, Error-prone region (A-rich/A-repetitive), Present in DMSO, Low depth     |
| BEZ235 vs Trametinib | 10     | 120467206 | 39                        | 7                   | 15        | CACUL1        | Intron                 | SNV          | C>A                             | N/A                       | Error-prone region (indel-rich, A-rich/A-repetitive), Present in DMSO                   |
| BEZ235 vs Trametinib | 16     | 46402854  | 27                        | 3                   | 10        | Unknown       | IGR                    | SNV          | A>T                             | N/A                       | Low MQ region, Low MQ reads, Low VAF, Low depth                                         |
| BEZ235 vs Trametinib | 19     | 39422827  | 36                        | 7                   | 16        | MRPS12        | Intron                 | SNV          | G>A                             | N/A                       | Error-prone region (A-rich/A-repetitive)                                                |
| BEZ235 vs Trametinib | 19     | 53874105  | 27                        | 4                   | 13        | ZNF525        | Intron                 | SNV          | G>A                             | N/A                       | Present in DMSO, Low VAF, Low depth                                                     |
| Trametinib vs BEZ235 | 1      | 148944673 | 44                        | 5                   | 10        | RP11-14N7.2   | lincRNA                | SNV          | A>G                             | N/A                       | Low VAF, Low MQ region, Present in BEZ235                                               |
| Trametinib vs BEZ235 | 1      | 151184288 | 30                        | 4                   | 12        | PIP5K1A       | Intron                 | INS          | A>AA                            | N/A                       | Repetitive A Region                                                                     |
| Trametinib vs BEZ235 | 3      | 73254936  | 34                        | 5                   | 13        | Unknown       | IGR                    | DEL          | ACAC>A                          | N/A                       | Repetitive AAC/ACC Region                                                               |
| Trametinib vs BEZ235 | 5      | 148686810 | 29                        | 4                   | 12        | AFAP1L1       | Intron                 | DEL          | AA>A                            | N/A                       | Repetitive A Region                                                                     |
| Trametinib vs BEZ235 | 7      | 61845544  | 26                        | 4                   | 13        | Unknown       | IGR                    | SNV          | A>T                             | N/A                       | Low MQ region, Present in DMSO, indel/GA-rich/GA-repetitive, Low tumor VAF, Low depth   |
| Trametinib vs BEZ235 | 9      | 8858093   | 29                        | 4                   | 12        | PTPRD         | Intron                 | DEL          | CCTCCT>CCT                      | N/A                       | Repetitive CCT Region                                                                   |
| Trametinib vs BEZ235 | 10     | 82007541  | 41                        | 6                   | 13        | Unknown       | IGR                    | SNV          | C>T                             | N/A                       | Low MQ region, GCC-repetitive, Multiple proximal indels, Low tumor VAF, Present in DMSO |
| Trametinib vs BEZ235 | 20     | 23066788  | 60                        | 8                   | 12        | CD93          | Frame_Shift_Del        | DEL          | AGCAGC>AGC                      | ENSP00000246006:p.Leu15fs | Also present in DMSO; CAG/Leucine repetitive regions                                    |
| Trametinib vs BEZ235 | 21     | 10139739  | 35                        | 4                   | 10        | Unknown       | IGR                    | SNV          | C>A                             | N/A                       | Low MQ region, Low tumor VAF, Present in DMSO                                           |
| Trametinib vs BEZ235 | 21     | 18882608  | 28                        | 4                   | 13        | Unknown       | IGR                    | SNV          | T>C                             | N/A                       | Low tumor VAF, Low depth, Present in DMSO                                               |
| Trametinib vs BEZ235 | 22     | 32084062  | 78                        | 9                   | 10        | PRR14L        | Intron                 | SNV          | C>A                             | N/A                       | Low tumor VAF, Error-prone region                                                       |
| DMSO vs Trametinib   | 1      | 185088963 | 31                        | 4                   | 11        | TRMT1L        | 3'UTR                  | DEL          | AA>A                            | N/A                       | Repetitive A Region                                                                     |
| DMSO vs Trametinib   | 5      | 150916828 | 34                        | 4                   | 11        | FAT2          | Intron                 | DEL          | TGGTGG>TGG                      | N/A                       | Repetitive TGG Region                                                                   |
| DMSO vs Trametinib   | 9      | 123715210 | 27                        | 3                   | 10        | CS            | Intron                 | DEL          | TT>T                            | N/A                       | Repetitive T Region                                                                     |
| DMSO vs Trametinib   | 10     | 987247    | 27                        | 3                   | 10        | RP11-363N22.2 | RNA                    | DEL          | TTTTG>T                         | N/A                       | Repetitive TTTG Region                                                                  |
| DMSO vs Trametinib   | 18     | 20889493  | 41                        | 5                   | 11        | TMEM241       | Intron                 | SNV          | A>T                             | N/A                       | Low tumor VAF, Variant rich region                                                      |
| DMSO vs BEZ235       | 1      | 150583473 | 27                        | 3                   | 10        | ENSA          | Intron                 | SNV          | A>T                             | N/A                       | Low tumor VAF, Low depth, Error-prone region                                            |
| DMSO vs BEZ235       | 1      | 229613232 | 73                        | 13                  | 15        | NUP133        | Intron                 | SNV          | G>A                             | N/A                       | Low tumor VAF, Error-prone region, Error-prone site, AT-rich/AT-repetitive              |
| DMSO vs BEZ235       | 7      | 143183523 | 36                        | 4                   | 10        | EPHA1-AS1     | RNA                    | DEL          | CC>C                            | N/A                       |                                                                                         |
| DMSO vs BEZ235       | 8      | 105450965 | 33                        | 5                   | 13        | DPYS          | Intron                 | DEL          | GAG>G                           | N/A                       | Repetitive AG Region                                                                    |
| DMSO vs BEZ235       | 10     | 987247    | 27                        | 3                   | 10        | RP11-363N22.2 | RNA                    | DEL          | TTTTG>T                         | N/A                       | Repetitive TTTG Region                                                                  |
| DMSO vs BEZ235       | 10     | 32833354  | 36                        | 5                   | 12        | CCDC7         | Intron                 | DEL          | CTG>C                           | N/A                       | Repetitive TG Region                                                                    |
| DMSO vs BEZ235       | 10     | 45634788  | 76                        | 11                  | 13        | Unknown       | IGR                    | SNV          | G>T                             | N/A                       | Error-prone region, A-repetitive, Low tumor VAF                                         |
| DMSO vs BEZ235       | 12     | 73210078  | 32                        | 4                   | 11        | Unknown       | IGR                    | SNV          | C>T                             | N/A                       | Low tumor VAF, Low MQ site and region, Poly-N repeats                                   |
| DMSO vs BEZ235       | 18     | 20889493  | 41                        | 5                   | 11        | TMEM241       | Intron                 | SNV          | A>T                             | N/A                       | Low tumor VAF, Low depth, Possible error-prone region                                   |
| DMSO vs BEZ235       | 19     | 9415630   | 25                        | 6                   | 19        | ZNF699        | Intron                 | SNV          | T>G                             | N/A                       | Low tumor VAF, Variant rich region, A-repetitive, low depth                             |
| DMSO vs BEZ235       | 21     | 11081322  | 23                        | 8                   | 26        | BAGE2         | RNA                    | SNV          | G>A                             | N/A                       | Variant rich region, low depth in BEZ235                                                |
| DMSO vs BEZ235       | 22     | 21066700  | 54                        | 6                   | 10        | PI4KA         | Intron                 | SNV          | G>A                             | N/A                       | Low tumor VAF                                                                           |

**Supplementary Table 1. Variants and indels identified in whole exome sequencing analysis comparing treated HCC1143 cells.**

A summary of variants and indels identified by MuTect analysis between treatment conditions in HCC1143 whole exome sequencing data. For each variant and indel identified in a given pairwise comparison, the contig, genomic position, count of the reference allele, count of the variant allele, tumor variant allele frequency (VAF), gene name, location classification (e.g. exon, intron, intergenic region), variant type (e.g. single nucleotide variant, SNV; insertion, INS; deletion, DEL), genomic change, protein change, and technical concerns for the call are provided.

**Supplementary Table 2 | Variants and indels identified in whole exome sequencing analysis of treated HCC1143 cells compared to a germline control.**

VAF = Variant allele frequency, IGR = Intergenic regions, RNA = variant/indel found in shared sequence of non-coding RNA

| Chromosome | Position  | Reference Allele | Alternate Allele | VAF in DMSO | VAF in BEZ235 | VAF in Trametinib | Gene     | Variant Classification | Variant Type | Genomic Change       | Protein Change              | Commonality                     |
|------------|-----------|------------------|------------------|-------------|---------------|-------------------|----------|------------------------|--------------|----------------------|-----------------------------|---------------------------------|
| 4          | 70079871  | A                | T                | 100         | 100           | 100               | UGT2B11  | Silent                 | SNV          | 4:g.70079871A>T      | None                        | Present in all three treatments |
| 6          | 33382010  | GT               | G                | 53          | 51            | 49                | PHF1     | Intron                 | DEL          | 6:g.33382010delGT    | N/A                         |                                 |
| 7          | 143982758 | C                | A                | 9           | 11            | 6                 | ARHGEF35 | Intron                 | SNV          | 7:g.143982758C>A     | N/A                         |                                 |
| 10         | 42534628  | ATT              | A                | 22          | 19            | 26                | Unknown  | IGR                    | DEL          | 10:g.42534628delATT  | N/A                         |                                 |
| 10         | 51769100  | G                | T                | 13          | 18            | 15                | AGAP6    | Missense_Mutation      | SNV          | 10:g.51769100G>T     | ENSP00000363168:p.Lys382Asn |                                 |
| 11         | 49896522  | T                | C                | 11          | 17            | 19                | Unknown  | IGR                    | SNV          | 11:g.49896522T>C     | N/A                         |                                 |
| 11         | 49896523  | G                | A                | 11          | 17            | 19                | Unknown  | IGR                    | SNV          | 11:g.49896523G>A     | N/A                         |                                 |
| 11         | 55059652  | C                | T                | 41          | 35            | 37                | Unknown  | IGR                    | SNV          | 11:g.55059652C>T     | N/A                         |                                 |
| 11         | 55890060  | A                | G                | 44          | 37            | 39                | OR8H3    | Missense_Mutation      | SNV          | 11:g.55890060A>G     | ENSP00000323928:p.Asp71Gly  |                                 |
| 14         | 70713380  | G                | A                | 8           | 9             | 6                 | ADAM21P1 | RNA                    | SNV          | 14:g.70713380G>A     | N/A                         |                                 |
| 14         | 70925214  | C                | T                | 20          | 20            | 15                | ADAM21   | Missense_Mutation      | SNV          | 14:g.70925214C>T     | ENSP00000474385:p.Ser333Phe |                                 |
| 16         | 84529249  | ACTG             | A                | 35          | 37            | 34                | TLDC1    | Intron                 | DEL          | 16:g.84529249delACTG | N/A                         |                                 |
| 19         | 55258778  | G                | A                | 60          | 63            | 63                | KIR2DL3  | Intron                 | SNV          | 19:g.55258778G>A     | N/A                         |                                 |
| 15         | 74365059  | C                | T                | 13          | N/A           | 10                | GOLGA6A  | Intron                 | SNV          | 15:g.74365059C>T     | N/A                         | Present in Trametinib and DMSO  |
| 2          | 92317863  | T                | C                | N/A         | N/A           | 9                 | Unknown  | IGR                    | SNV          | 2:g.92317863T>C      | N/A                         | Tram Only                       |
| 4          | 49637265  | T                | G                | 9           | N/A           | N/A               | Unknown  | IGR                    | SNV          | 4:g.49637265T>G      | N/A                         | DMSO only                       |
| X          | 49360749  | C                | G                | 8           | N/A           | N/A               | GAGE2A   | Intron                 | SNV          | X:g.49360749C>G      | N/A                         | DMSO only                       |
| 10         | 42387802  | A                | T                | N/A         | 10            | N/A               | Unknown  | IGR                    | SNV          | 10:g.42387802A>T     | N/A                         | BEZ235 only                     |
| 10         | 42394915  | G                | T                | N/A         | 9             | N/A               | Unknown  | IGR                    | SNV          | 10:g.42394915G>T     | N/A                         | BEZ235 only                     |

**Supplementary Table 2. Variants and indels identified in whole exome sequencing analysis of treated HCC1143 cells compared to a germline control.**

A summary of variants and indels identified by MuTect2 analysis between whole exome data from Trametinib, BEZ235, or DMSO-treated HCC1143 cells and published whole exome data of a patient-matched normal cell line, HCC1143-BL. For each variant and indel identified, the chromosome, position, reference allele, alternate allele, variant allele frequency (VAF) in DMSO, VAF in BEZ235, VAF in Trametinib, gene name, variant classification, variant type, genomic change, protein change, and commonality with other treatment groups are provided.

## Supplementary Methods

### Computational Modeling

The purpose of this document is to explain the fold change simulations in greater detail (Fig. 3h, Supplementary Fig. 8a). Motivation, notation, and the dynamical system representation are discussed. Details on model identification and fold change calculations follow.

#### I. Motivation

We used mathematical modeling to examine if Darwinian selection or cell-state transition could explain the differentiation-state trends observed in the HCC1143 cell line treated with Trametinib or BEZ235. Our models were identified with experimental data and served as tools to investigate the feasibility of these biological hypotheses.

Recall from Fig. 3a that the proportion of  $K14^{\text{high}}$  cells increased while the proportion of  $K14^{\text{low}}$  cells decreased over time following treatment with Trametinib (vs. DMSO); treatment with BEZ235 induced the reverse trend to a lesser degree. We asked which population-level phenomena might explain the observed outcomes: asymmetrical cell-state death, cell-state transition, or asymmetrical cell-state division. The last option is unlikely based on EdU+ analysis (Fig. 3b). To examine the remaining options, we tested the following hypotheses via computational modeling:

- *Darwinian selection.* Asymmetrical cell-state death can explain the observations.
- *Cell-state transition.* Cell-state transition can explain the observations under evenly distributed cell-state death.

Under the Darwinian selection hypothesis, death was allocated to favor the observed experimental outcome (Trametinib vs. DMSO: all death in  $K14^{\text{low}}$ ; BEZ235 vs. DMSO: all death in  $K14^{\text{high}}$ ). However, even under these favorable assumptions, fold change simulations could not match the empirical observations (Fig. 3h (left), Supplementary Fig. 8a (left)).

Under the cell-state transition hypothesis, however, death was allocated between cell-states in an unbiased fashion, a realistic guess for the true death distribution. Interestingly, in this more natural setting, it was found that simulations with cell-state transition enabled could match the experimental outcome (Fig. 3h (right), Supplementary Fig. 8a (right)).

While model-based conclusions do not constitute truth, these findings do suggest that cell-state transition plays a more important role than state-selective death in driving drug-induced differentiation-state enrichment following treatment with certain targeted therapies.

#### II. Notation

Symbols and definitions are below. All terms are agent-specific (e.g., DMSO, Trametinib). *Gain* is the discrete-time analog of *rate*; the latter is used in the main text because it is expected to be more familiar to most readers. Terms labeled  $\rho$  are parameters of the system dynamics<sup>1</sup>.

| Symbol                                | Definition                                                       |
|---------------------------------------|------------------------------------------------------------------|
| $\#K14^{\text{lo}}_{\text{obs}}$      | observed number of $K14^{\text{low}}$ cells via image cytometry  |
| $\#K14^{\text{hi}}_{\text{obs}}$      | observed number of $K14^{\text{high}}$ cells via image cytometry |
| $f^{\text{dead}}_{\text{obs}}$        | observed fraction of dead cells via YO-PRO-1                     |
| $\#K14^{\text{lo}}_{\text{live, tr}}$ | number of $K14^{\text{low}}$ live cells for model training       |
| $\#K14^{\text{hi}}_{\text{live, tr}}$ | number of $K14^{\text{high}}$ live cells for model training      |
| $\#\text{dead}_{\text{tr}}$           | number of dead cells for model training                          |

|                            |                                                                     |
|----------------------------|---------------------------------------------------------------------|
| $\rho_{hD}$                | death gain, $K14^{high}$                                            |
| $\rho_{lD}$                | death gain, $K14^{low}$                                             |
| $\rho_{h \rightarrow l}$   | transition gain from $K14^{high}$ to $K14^{low}$                    |
| $\rho_{l \rightarrow h}$   | transition gain from $K14^{low}$ to $K14^{high}$                    |
| $\rho_h$                   | cell division gain, $K14^{high}$                                    |
| $\rho_l$                   | cell division gain, $K14^{low}$                                     |
| $\#K14^{low}_{live, sim}$  | number of $K14^{low}$ live cells generated via dynamics simulation  |
| $\#K14^{high}_{live, sim}$ | number of $K14^{high}$ live cells generated via dynamics simulation |
| $\#dead_{sim}$             | number of dead cells generated via dynamics simulation              |

### III. Dynamical system

A linear time-invariant dynamical system was chosen to model cell-state interactions,  $x[k+1] = A \cdot x[k]$ , where state vector  $x = (\text{number of } K14^{high} \text{ live cells, number of } K14^{low} \text{ live cells, number of dead cells})^T \in \mathbb{R}^3$ ,  $[k, k+1)$  is a 12-hour interval, and dynamics matrix  $A \in \mathbb{R}^{3 \times 3}$  is parameterized as follows:

$$A = \begin{bmatrix} \rho_h - \rho_{h \rightarrow l} - \rho_{hD} & \rho_{l \rightarrow h} & 0 \\ \rho_{h \rightarrow l} & \rho_l - \rho_{l \rightarrow h} - \rho_{lD} & 0 \\ \rho_{hD} & \rho_{lD} & 1 \end{bmatrix}.$$

Values of the dynamics parameters were identified using training data computed from timecourse data in a manner specified by hypothesis and chemical agent (Sec. III). Thus, there is a *unique* dynamics matrix for each (hypothesis, agent) pair:

| Darwinian selection hypothesis                                                                   | Cell-state transition hypothesis                                                                         |
|--------------------------------------------------------------------------------------------------|----------------------------------------------------------------------------------------------------------|
| $A_{DMSO} = \begin{bmatrix} 1.307 & 0 & 0 \\ 0 & 1.307 & 0 \\ 0.006 & 0.006 & 1 \end{bmatrix}$   | $A_{DMSO} = \begin{bmatrix} 0.301 & 0.337 & 0 \\ 1 & 1.014 & 0 \\ 0.049 & 0 & 1 \end{bmatrix}$           |
| $A_{Trametinib} = \begin{bmatrix} 1.117 & 0 & 0 \\ 0 & 0.946 & 0 \\ 0 & 0.171 & 1 \end{bmatrix}$ | $A_{Trametinib} = \begin{bmatrix} 1.023 & 0.241 & 0 \\ 0.014 & 0.832 & 0 \\ 0.036 & 0 & 1 \end{bmatrix}$ |
| $A_{BEZ235} = \begin{bmatrix} 0.900 & 0 & 0 \\ 0 & 1.132 & 0 \\ 0.232 & 0 & 1 \end{bmatrix}$     | $A_{BEZ235} = \begin{bmatrix} 0.880 & 0 & 0 \\ 0.149 & 1.096 & 0 \\ 0.068 & 0 & 1 \end{bmatrix}$         |

Propagating a given matrix  $N$  time steps forward from initial condition,  $x_0 \in \mathbb{R}^3$ , yields state vector at time  $N$ ,  $x[N] = A^N \cdot x_0$ . For each (hypothesis, agent) pair, quantities of  $K14^{high}$  live cells,  $K14^{low}$  live cells, and dead cells were generated over time in this way using the appropriate dynamics matrix.

### IV. On training data and parameter constraints for model identification

Dynamical models were generated from timecourse data to examine the feasibility of two distinct hypotheses (Darwinian selection, Cell-state transition). The tables below summarize training data computations and parameter constraints for such models under each hypothesis in the context of Trametinib vs. DMSO. (For BEZ235 vs. DMSO, swap  $K14^{high}$  and  $K14^{low}$ .) Additional practical constraints (omitted below) were enforced, e.g., nonnegative gains<sup>1</sup>

## K14<sup>high</sup> Darwinian selection hypothesis

| Agent      | Assumptions on cell-state death & transition                                 | How to compute training data for model identification from timecourse observations                                                                                                                                           | Parameter constraints                                                                                   |
|------------|------------------------------------------------------------------------------|------------------------------------------------------------------------------------------------------------------------------------------------------------------------------------------------------------------------------|---------------------------------------------------------------------------------------------------------|
| Trametinib | All death in K14 <sup>low</sup><br>Transition inhibited                      | $\#dead_{tr} = f_{obs}^{dead} \cdot (\#K14_{obs}^{lo} + \#K14_{obs}^{hi})$<br>$\#K14_{live, tr}^{lo} = \#K14_{obs}^{lo} - \#dead_{tr}$<br>$\#K14_{live, tr}^{hi} = \#K14_{obs}^{hi}$                                         | $\rho_{hD} = 0$<br>$\rho_{h \rightarrow l} = \rho_{l \rightarrow h} = 0$<br>$\rho_h = \rho_l$           |
| DMSO       | Equal death K14 <sup>high</sup> & K14 <sup>low</sup><br>Transition inhibited | $\#dead_{tr} = f_{obs}^{dead} \cdot (\#K14_{obs}^{lo} + \#K14_{obs}^{hi})$<br>$\#K14_{live, tr}^{lo} = (1 - f_{obs}^{dead}) \cdot \#K14_{obs}^{lo}$<br>$\#K14_{live, tr}^{hi} = (1 - f_{obs}^{dead}) \cdot \#K14_{obs}^{hi}$ | $\rho_{hD} = \rho_{lD}$ ;<br>$\rho_{h \rightarrow l} = \rho_{l \rightarrow h} = 0$<br>$\rho_h = \rho_l$ |

## Cell-state transition hypothesis

| Agent      | Assumptions on cell-state death & transition                               | How to compute training data for model identification from timecourse observations                                                                                                                                           | Parameter constraints |
|------------|----------------------------------------------------------------------------|------------------------------------------------------------------------------------------------------------------------------------------------------------------------------------------------------------------------------|-----------------------|
| Trametinib | Equal death K14 <sup>high</sup> & K14 <sup>low</sup><br>Transition enabled | $\#dead_{tr} = f_{obs}^{dead} \cdot (\#K14_{obs}^{lo} + \#K14_{obs}^{hi})$<br>$\#K14_{live, tr}^{lo} = (1 - f_{obs}^{dead}) \cdot \#K14_{obs}^{lo}$<br>$\#K14_{live, tr}^{hi} = (1 - f_{obs}^{dead}) \cdot \#K14_{obs}^{hi}$ | $\rho_h = \rho_l$     |
| DMSO       | Equal death K14 <sup>high</sup> & K14 <sup>low</sup><br>Transition enabled | $\#dead_{tr} = f_{obs}^{dead} \cdot (\#K14_{obs}^{lo} + \#K14_{obs}^{hi})$<br>$\#K14_{live, tr}^{lo} = (1 - f_{obs}^{dead}) \cdot \#K14_{obs}^{lo}$<br>$\#K14_{live, tr}^{hi} = (1 - f_{obs}^{dead}) \cdot \#K14_{obs}^{hi}$ | $\rho_h = \rho_l$     |

## V. How to compute simulated fold change

Our computational models provided *simulated* quantities of K14<sup>high</sup> live cells, K14<sup>low</sup> live cells, and dead cells. Image cytometry provided *measured* quantities of K14<sup>high</sup> cells (live & dead) and K14<sup>low</sup> cells (live & dead); phenotypes of dead cells were unobservable. Thus, the simulated values were processed further to quantify K14<sup>high</sup> cells (live & dead) and K14<sup>low</sup> cells (live & dead) for direct comparison with biology (Fig. 3h, Supplementary Fig. 8a). These steps in the context of Trametinib vs. DMSO are below. (For BEZ235 vs. DMSO, swap K14<sup>high</sup> and K14<sup>low</sup>.) Let agent  $i \in \{\text{Trametinib}, \text{DMSO}\}$  and phenotype  $p \in \{K14^{hi}, K14^{lo}\}$ . For each time  $k \in \{0, 12, \dots, 72\}$  hr, simulated fold change of phenotype  $p$  at time  $k$  is the ratio,  $\frac{[\text{fraction}_{sim}^p]_{\text{time } k, \text{Trametinib}}}{[\text{fraction}_{sim}^p]_{\text{time } k, \text{DMSO}}}$ , in

which simulated phenotype  $p$  fraction is defined as:

$$[\text{fraction}_{sim}^{K14^{lo}}]_{\text{time } k, \text{agent } i} = \left[ \frac{\#K14_{sim}^{lo}}{\#K14_{live, sim}^{hi} + \#K14_{live, sim}^{lo} + \#dead_{sim}} \right]_{\text{time } k, \text{agent } i} \quad (1a)$$

$$[\text{fraction}_{sim}^{K14^{hi}}]_{\text{time } k, \text{agent } i} = \left[ \frac{\#K14_{sim}^{hi}}{\#K14_{live, sim}^{hi} + \#K14_{live, sim}^{lo} + \#dead_{sim}} \right]_{\text{time } k, \text{agent } i} \quad (1b)$$

The denominator of (1), cell population total, is obtained directly via dynamics simulation. The numerator of (1) is the *in silico* quantity of phenotype  $p$  cells (live & dead) at time  $k$  after initial treatment with agent  $i$ , which requires additional computation based on (hypothesis, agent) pair. Under K14<sup>high</sup> Darwinian selection hypothesis, death is allocated to the weaker cell state, K14<sup>low</sup>, in entirety under Trametinib:

$$[\#K14_{sim}^{lo}]_{\text{time } k, \text{Trametinib}} = [\#K14_{live, sim}^{lo} + \#dead_{sim}]_{\text{time } k, \text{Trametinib}} \quad (2)$$

$$[\#K14_{sim}^{hi}]_{\text{time } k, \text{Trametinib}} = [\#K14_{live, sim}^{hi}]_{\text{time } k, \text{Trametinib}} \quad (3)$$

However, under the cell-state transition hypothesis, Trametinib-induced death is evenly distributed between cell states:

$$[\#K14_{sim}^{lo}]_{\text{time } k, \text{Trametinib}} = \left[ \frac{\#K14_{live, sim}^{lo}}{1 - \text{fraction}_{sim}^{dead}} \right]_{\text{time } k, \text{Trametinib}} \quad (4)$$

$$\left[ \#K14_{sim}^{hi} \right]_{\text{time } k, \text{ Trametinib}} = \left[ \frac{\#K14_{live, sim}^{hi}}{1 - \text{fraction}_{sim}^{dead}} \right]_{\text{time } k, \text{ Trametinib}}, \quad (5)$$

such that simulated dead fraction at time  $k$  under agent  $i$  is:

$$\left[ \text{fraction}_{sim}^{dead} \right]_{\text{time } k, \text{ agent } i} = \left[ \frac{\#dead_{sim}}{\#K14_{live, sim}^{hi} + \#K14_{live, sim}^{lo} + \#dead_{sim}} \right]_{\text{time } k, \text{ agent } i}. \quad (6)$$

For both hypotheses, because  $K14^{high}$  and  $K14^{low}$  should be similarly fit in absence of therapy, death is evenly distributed between cell states under DMSO. Replace Trametinib in (4) and (5) with DMSO, and the computation follows.

### Whole exome sequencing

Genomic DNA (2ug) derived from tissue-cultured HCC1143 cells treated with DMSO, 1uM BEZ235, or 1uM Trametinib was sonicated using a Covaris E220 Focused Ultrasonicator (Covaris, Inc.) to an average size of 150bp. Libraries were prepared in triplicate using 500ng of above fragmented gDNA with the KAPA HyperPrep Library Preparation Kit (KAPA Biosystems) using Agilent SureSelect XT Target Enrichment System Reagents (Agilent) and custom adaptors containing 14bp degenerate UMI and 8bp fixed sample-indices. Whole-exome hybridization capture was carried out using Agilent Human All Exome V5 Kit, following manufacturer's protocols. Samples were multiplexed and 100bp, paired-end sequenced following cluster generation on the Illumina HiSeq 2500 by the OHSU Massively Parallel Sequencing Shared Resource. Raw paired-end sequencing reads (100bp) output in FastQ format by the HiSeq 2500 were aligned using BWA MEM (0.7.12) software to the full hg19 genomic assembly (GATK, Broad Institute). Picard tools (1.119), SAMtools<sup>2</sup>, and GATK (3.3-0) were used to sort, index, remove PCR duplicates, locally realign and merge bam files, as well as to generate target coverage and duplication metrics (<http://broadinstitute.github.io/picard>). After data processing, a mean of 300X on-target coverage was obtained for the combined replicate libraries with 85% of on-target reads exceeding 100X depth.

### Mutation Calling

Aligned and processed bam files were compared for calling somatic variants between treatments in a pairwise fashion using MuTect (1.1.4, GATK, Broad Institute). Similar comparisons for indels were done using GATK4 MuTect2 (2.1-beta, Broad Institute). Raw whole-exome sequencing (WES) FastQ data for patient-matched normal HCC1143-BL cell-lines, previously sequenced by Daemon, et al (2013)<sup>3</sup> and available on GEO under accession number GSE48216, was aligned using the pipeline described above and the resulting bam files were used as a "matched normal" in calling point mutations and indels in all three treatment pools vs. "normal" also using MuTect as above. All resulting variants were filtered to those labeled "KEEP" by MuTect and having at least 30X coverage and 10% variant allele frequency (vaf) in the "tumor" (treatment) and at least 15X coverage (with no presence of the alternate base) in the "normal" (HCC1143-BL, or second treatment for pairwise analysis). Variants listed in the dbSNP database (build 137, <https://www.ncbi.nlm.nih.gov/projects/SNP/>) were omitted and the resulting variant list was further hand curated using the Integrative Genomics Viewer (IGV, 2.3.82, <http://software.broadinstitute.org/software/igv/>) and SAMtools mpileup software<sup>2</sup> (1.2, <https://github.com/samtools/samtools>) to identify error-rich reads and other sources of errant calls. Variant allele frequencies presented for calls against HCC1143-BL were not corrected for differences in copy number or ploidy. Degenerate tags with sample-specific, fixed-indices introduced at the point of adaptor ligation were used to distinguish reads representing PCR



duplicates from reads mapping to the same start and stop position yet derived from unique input molecules, either from the same or independent library preparation(s), in order to preserve the high complexity of the combined treatment libraries observed when sequenced to high depth (in-house software).

## References

1. Chapman, M. P. *et al.* A model of phenotypic state dynamics initiates a promising approach to control heterogeneous malignant cell populations. in *2016 IEEE 55th Conference on Decision and Control (CDC)* 2481–2487 (2016). doi:10.1109/CDC.2016.7798634
2. Li, H. *et al.* The Sequence Alignment/Map format and SAMtools. *Bioinforma. Oxf. Engl.* **25**, 2078–2079 (2009).
3. Daemen, A. *et al.* Modeling precision treatment of breast cancer. *Genome Biol.* **14**, R110 (2013).
4. Gusnanto, A., Wood, H. M., Pawitan, Y., Rabbitts, P. & Berri, S. Correcting for cancer genome size and tumour cell content enables better estimation of copy number alterations from next-generation sequence data. *Bioinformatics* **28**, 40–47 (2012).
