# Supplementary material for: Differentiation-state plasticity is a targetable resistance mechanism in basal-like breast cancer
Source: PubMed Central journal article supplement (PMC6145927; doi:10.1038/s41467-018-05729-w), 2018-09-19
Supplement: 41467_2018_5729_MOESM3_ESM.pdf [file 41467_2018_5729_MOESM3_ESM.pdf]

## **Description of Additional Supplementary Files**

File Name: Supplementary Data 1

Description: Images and accompanying image cytometry analysis for all tumors analyzed in Figure 1

File Name: Supplementary Data 2

Description: Results from the targeted therapy screen in HCC1143 and SUM149PT cell lines

File Name: Supplementary Data 3

Description: Tables describing the genesets used in the study and all raw GSEA results

File Name: Supplementary Data 4

Description: A zip file containing all raw .vcf files from Mutect analyses and .seg files from LP-WGS copy number alteration analyses

File Name: Supplementary Data 5

Description: VIPER results and pathway ontology analyses

File Name: Supplementary Data 6

Description: SciATAC-seq DNA-binding domain motif enrichment analysis
